# Supplementary material
Source: PubMed Central journal article supplement (PMC10307950)

**Figure 1D**

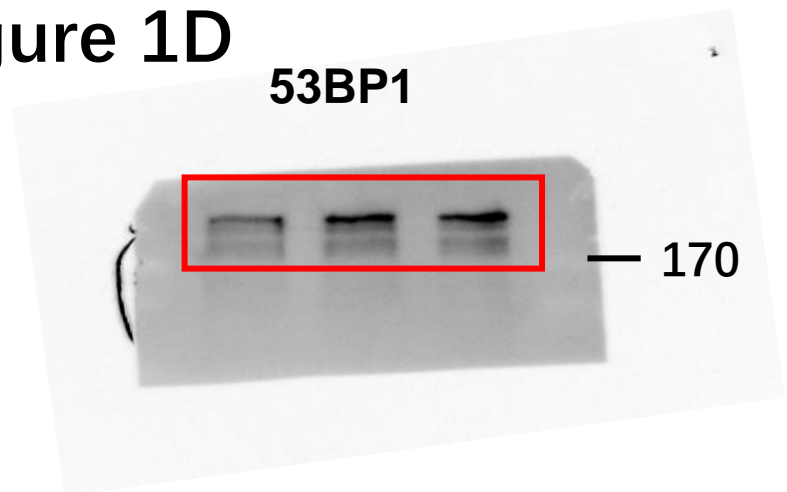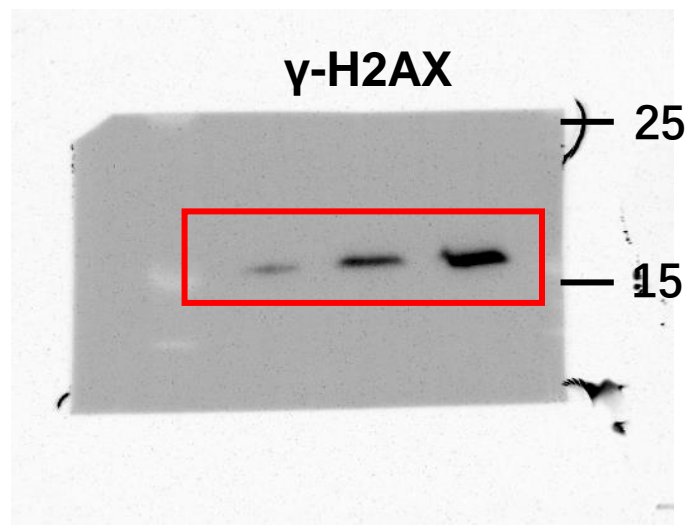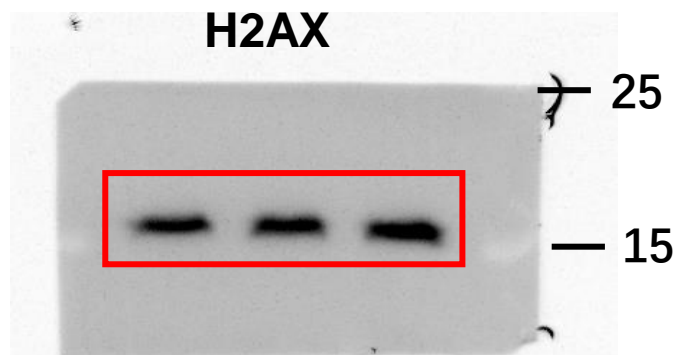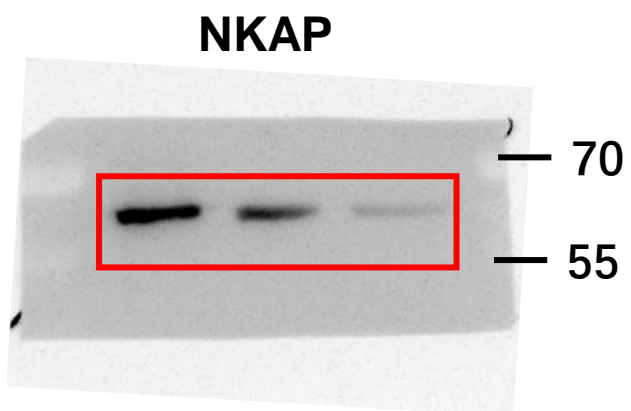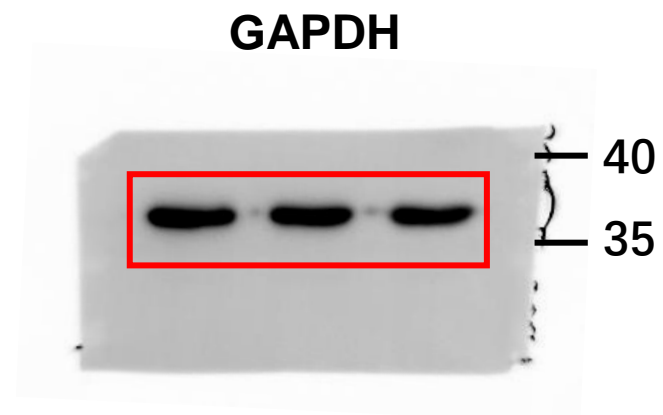

**Figure 2H**  $\gamma$ -H2AX

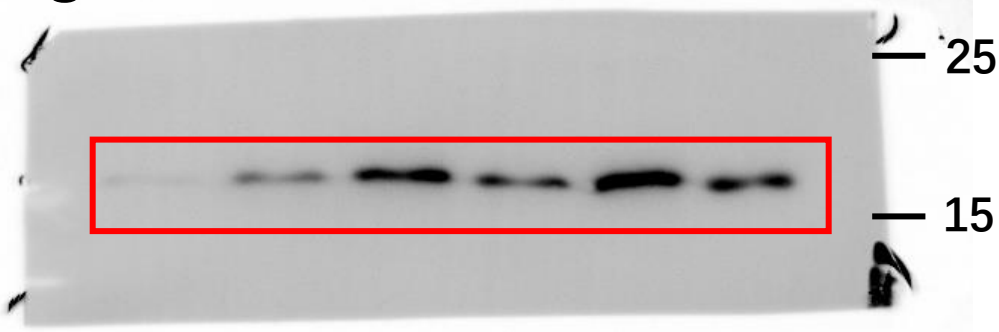

H2AX

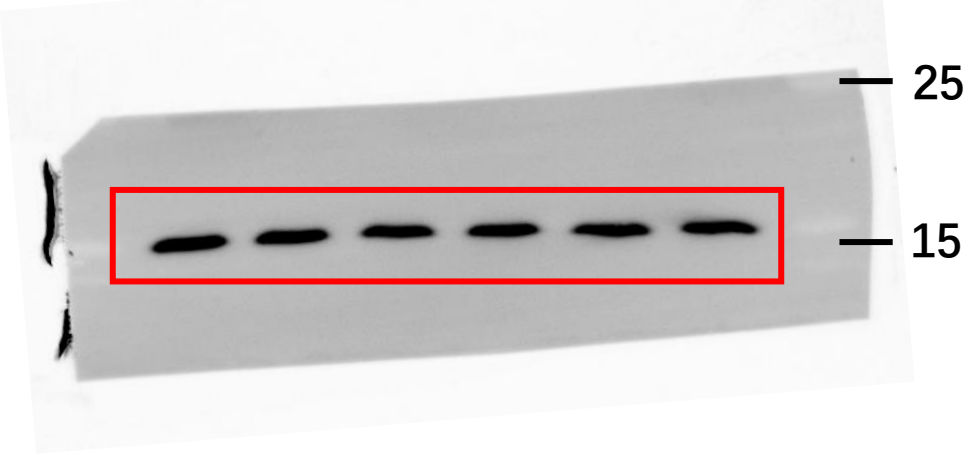

RNH1-Flag

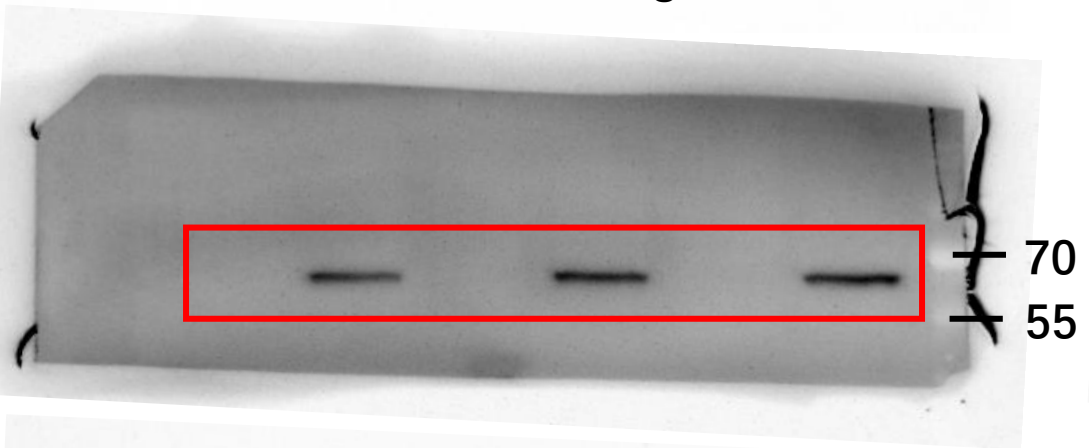

NKAP

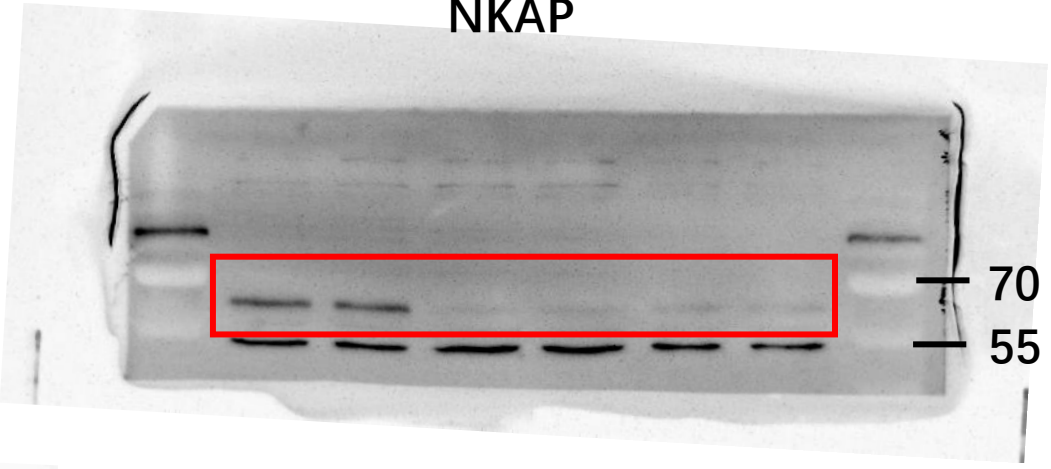

GAPDH

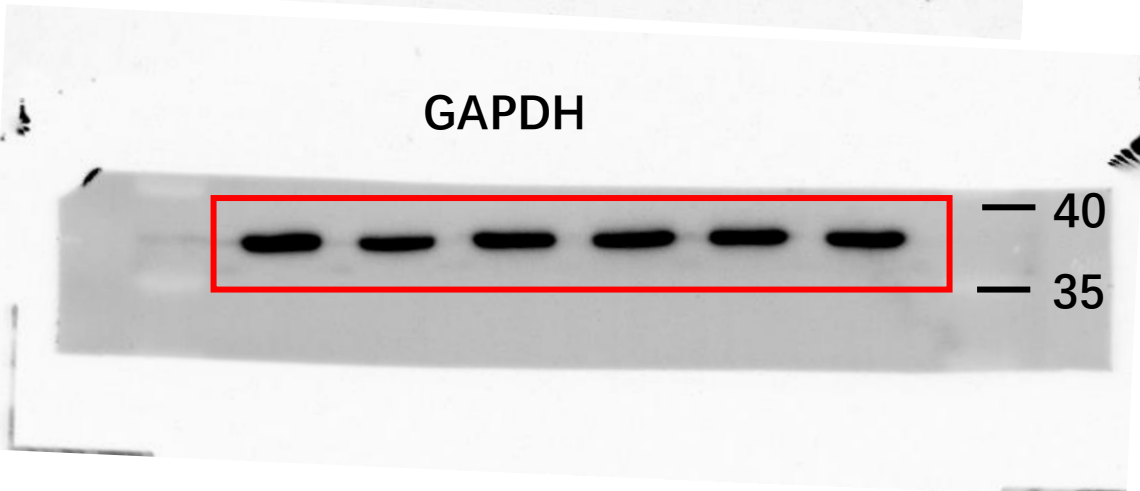

Figure 3H

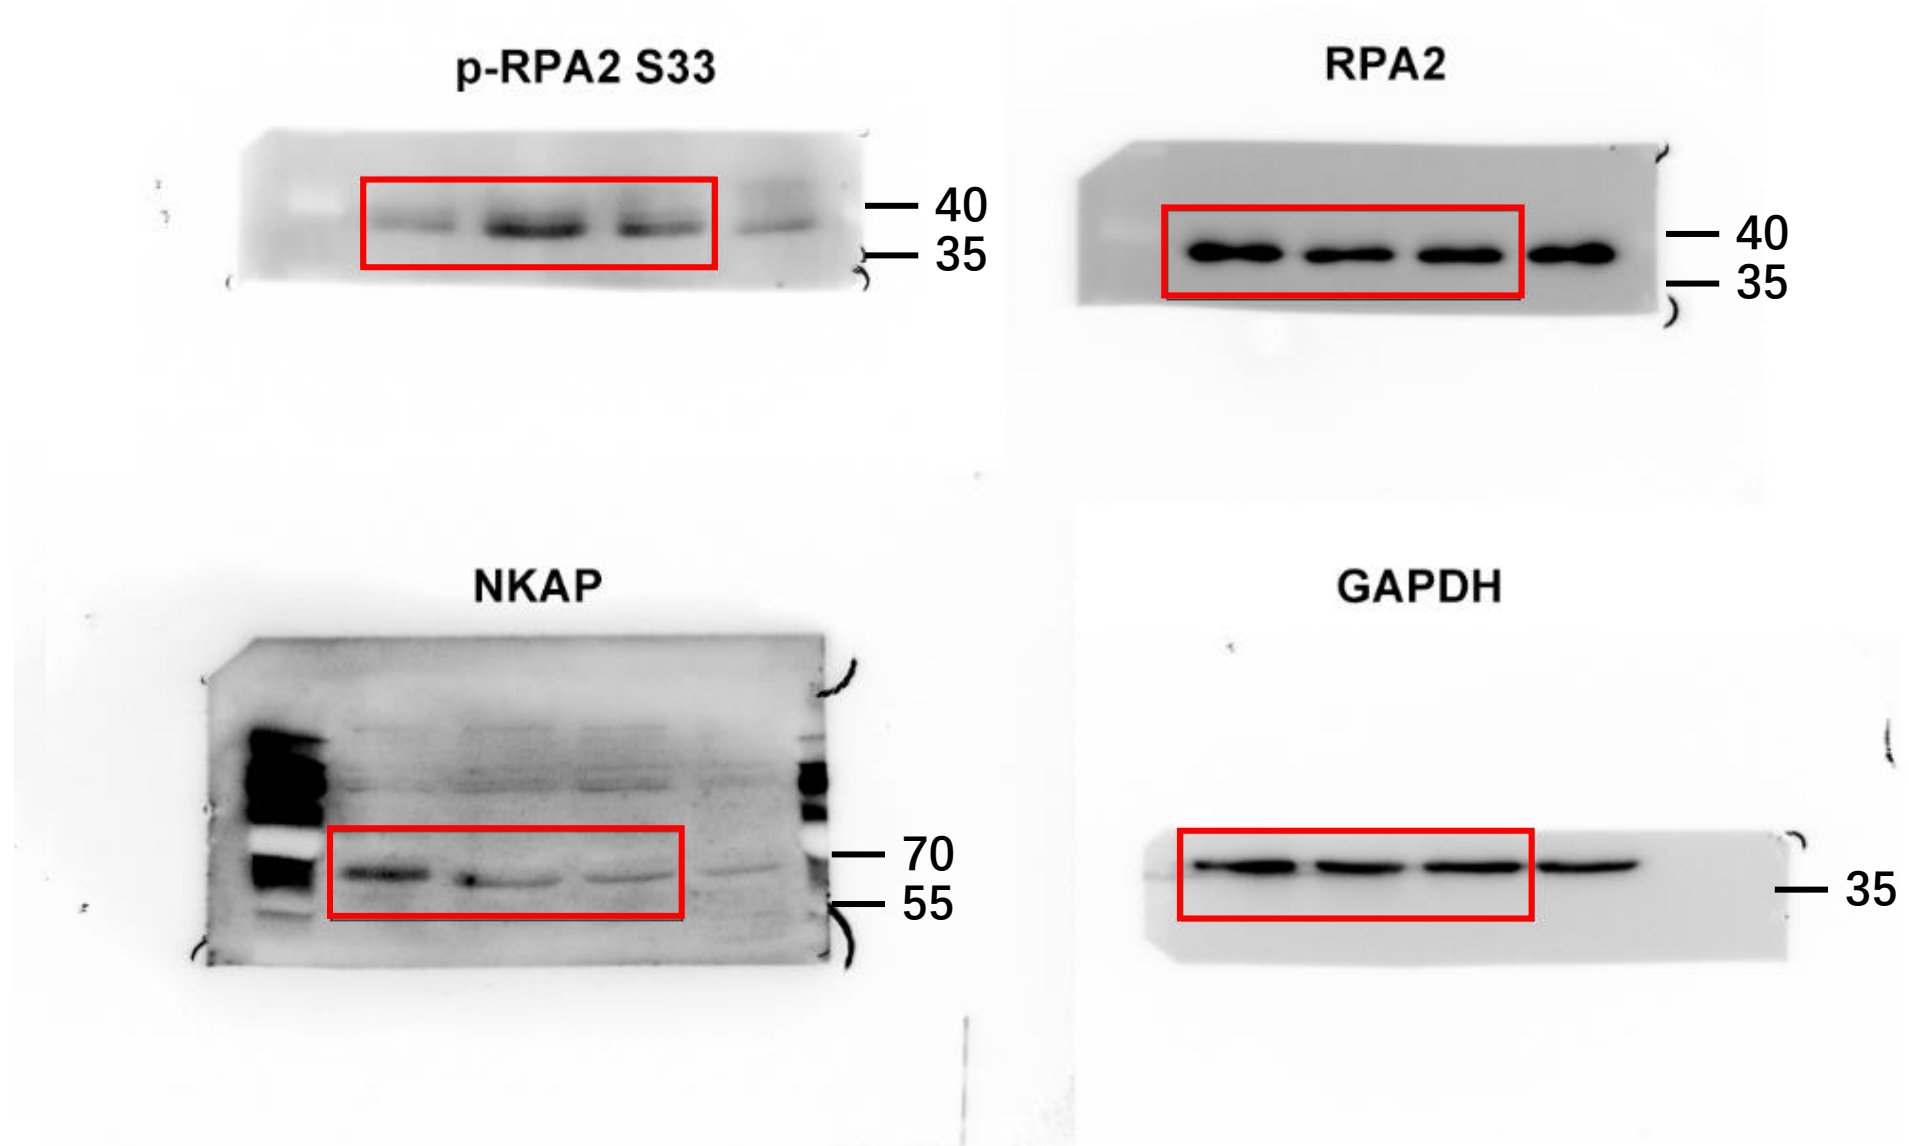

Figure 4E

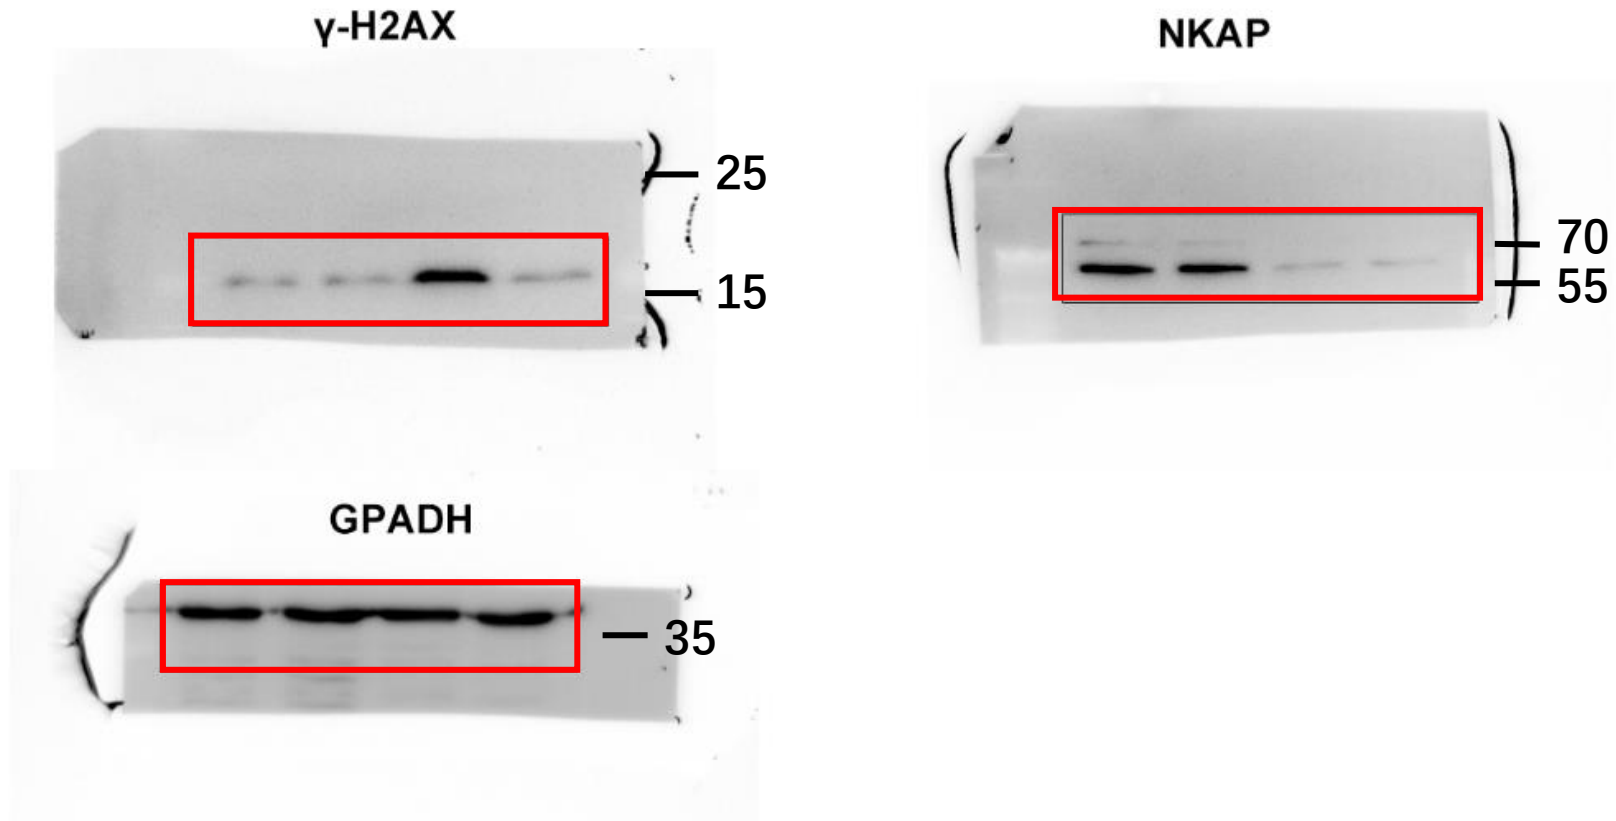

**Figure 5A**

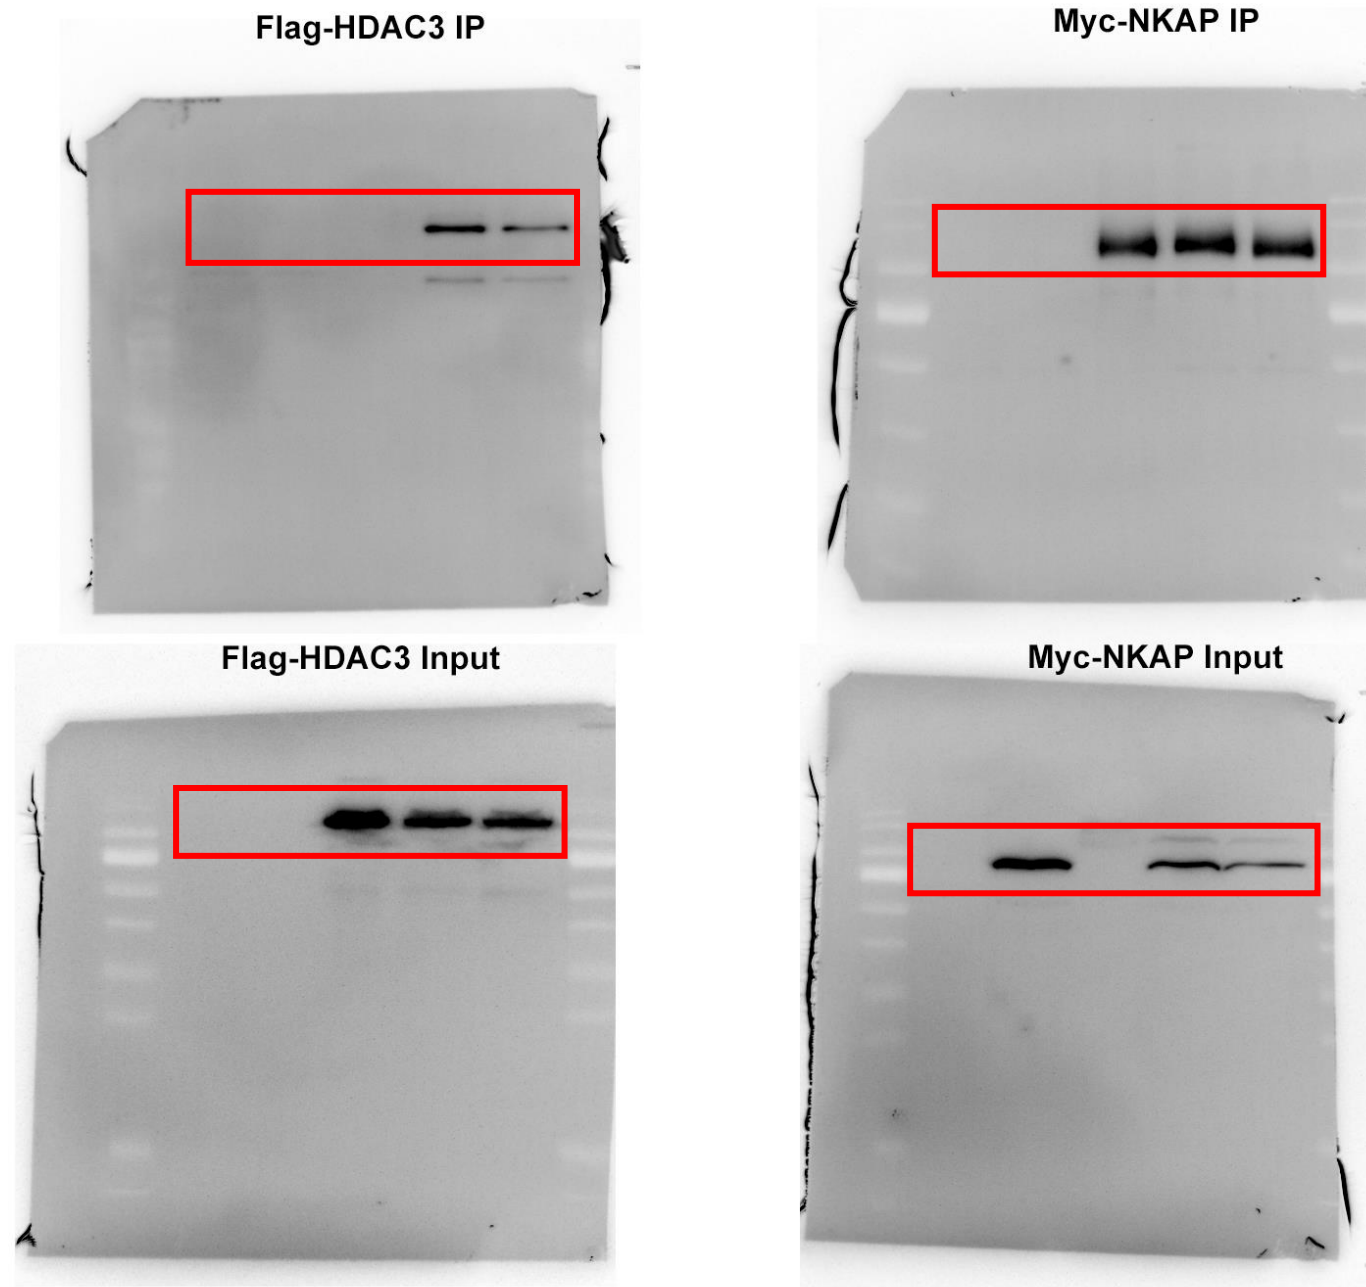

**Figure 5B**

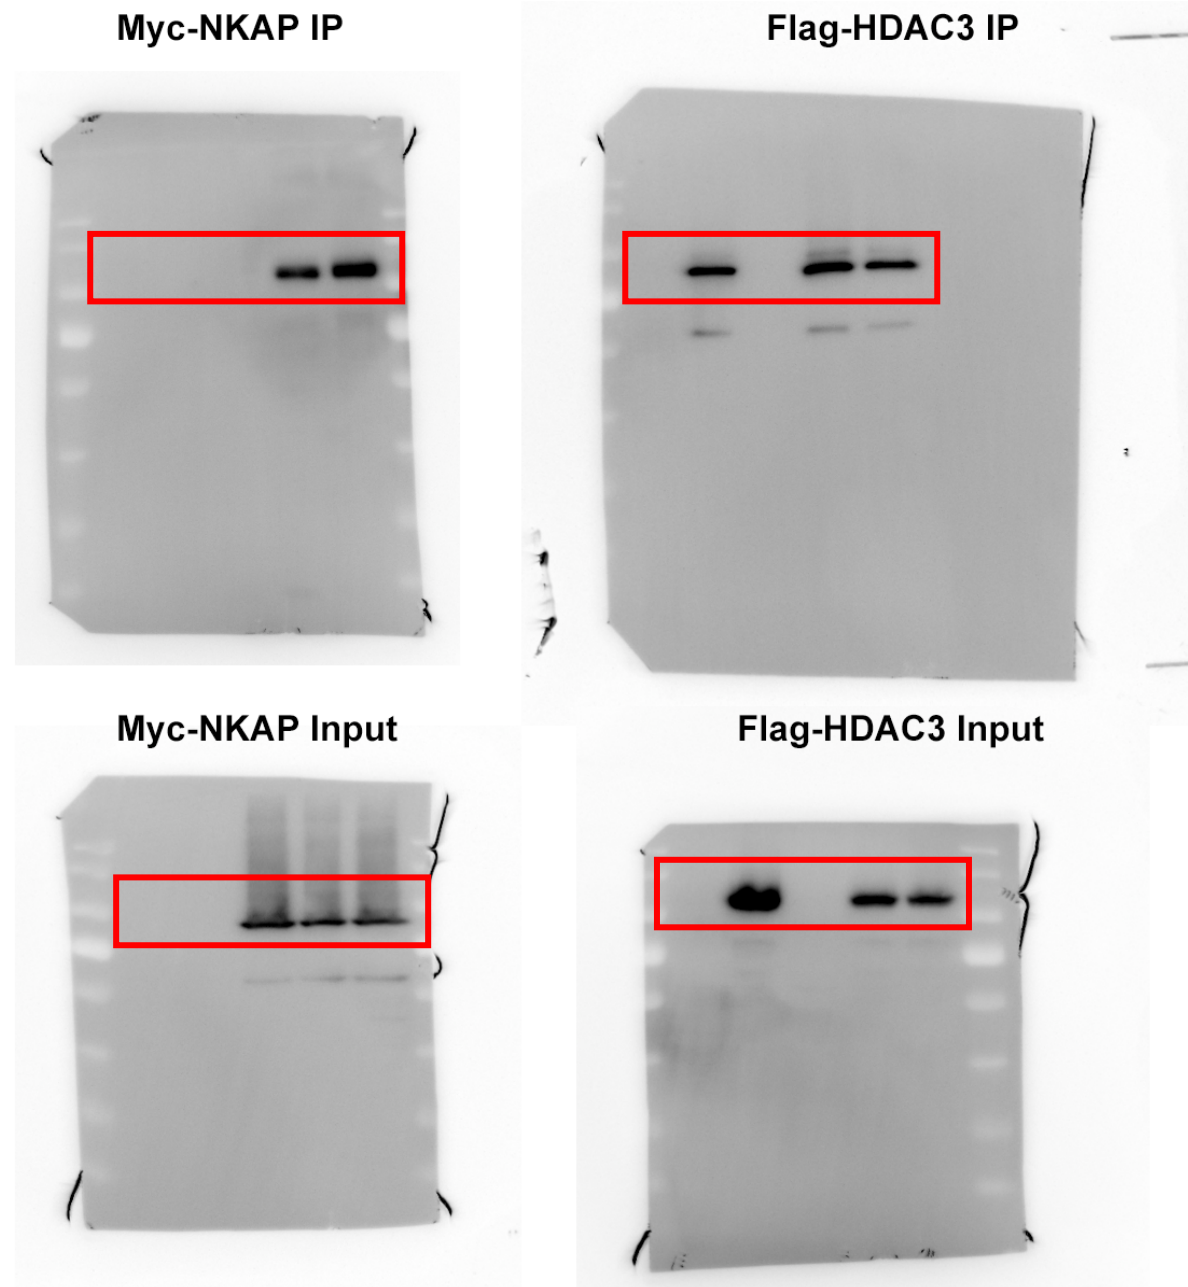

Figure 5C

HDAC3

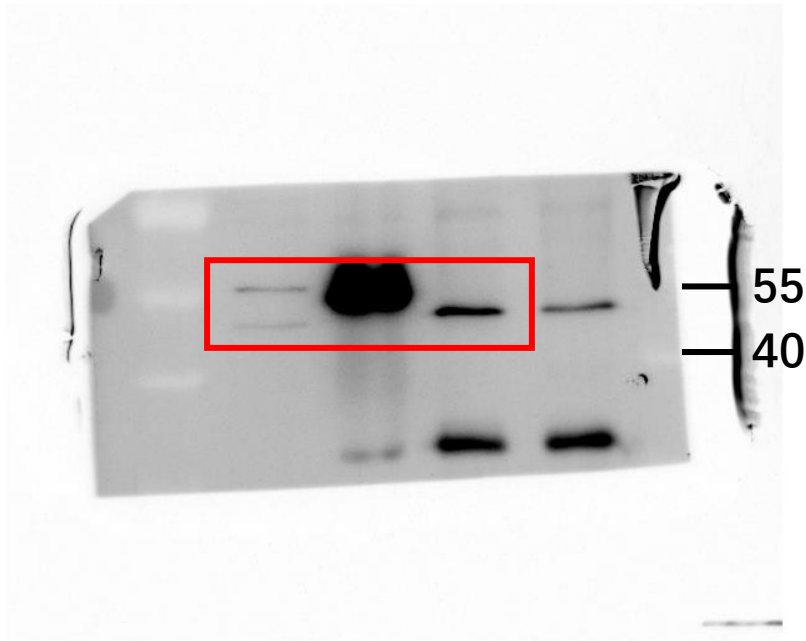

NKAP

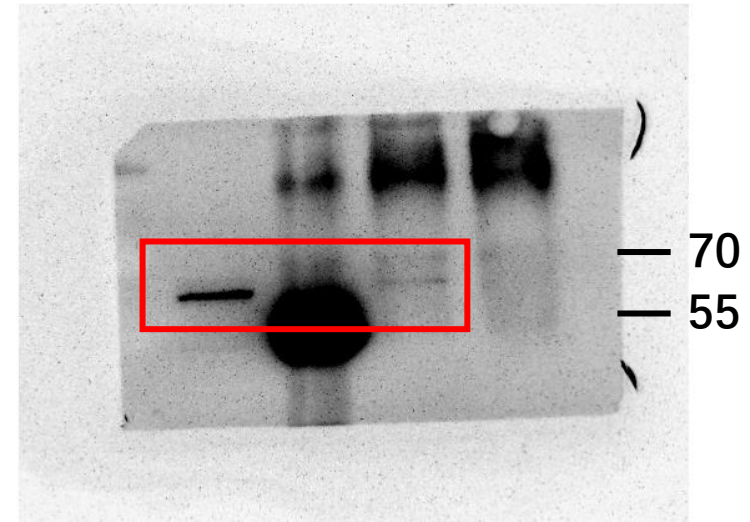

Figure 5K

RNH1-Flag

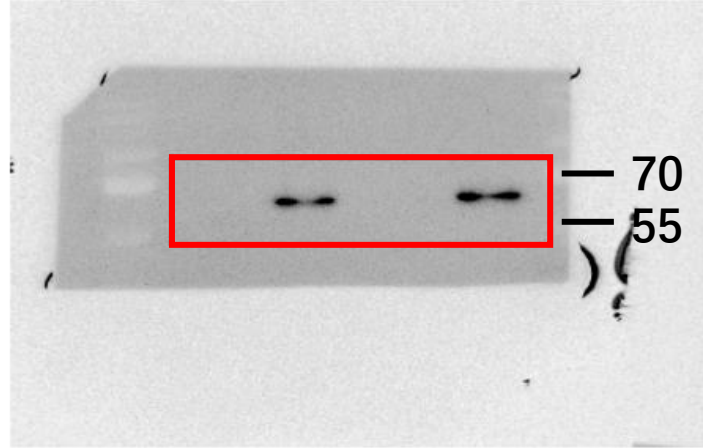

$\gamma$ -H2AX

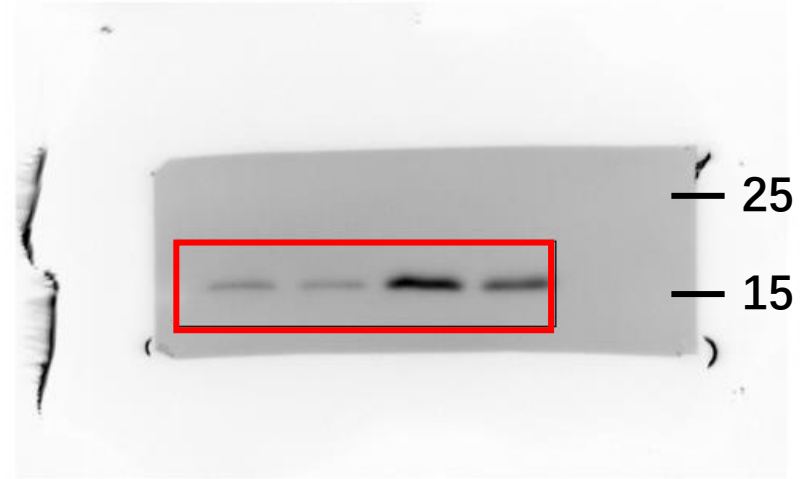

HDAC3

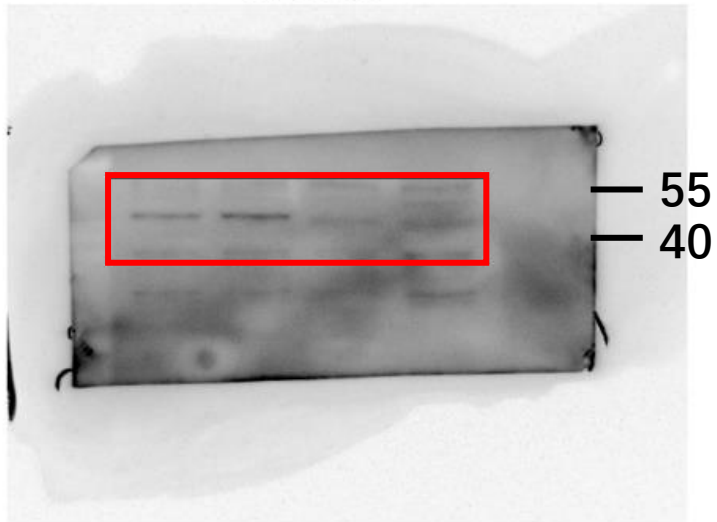

GAPDH

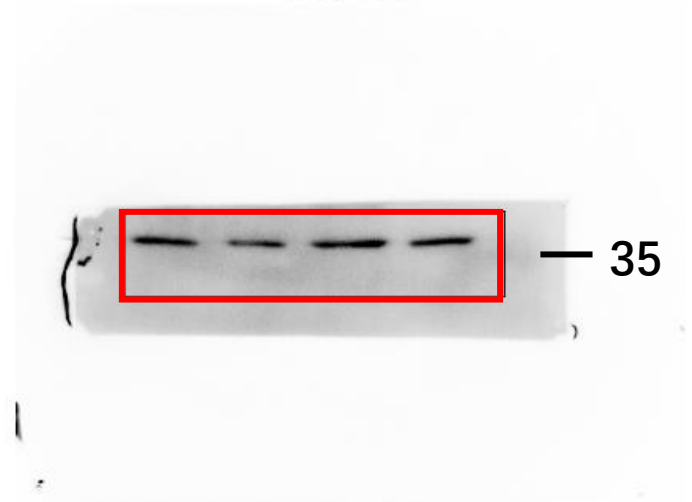



Figure 6A

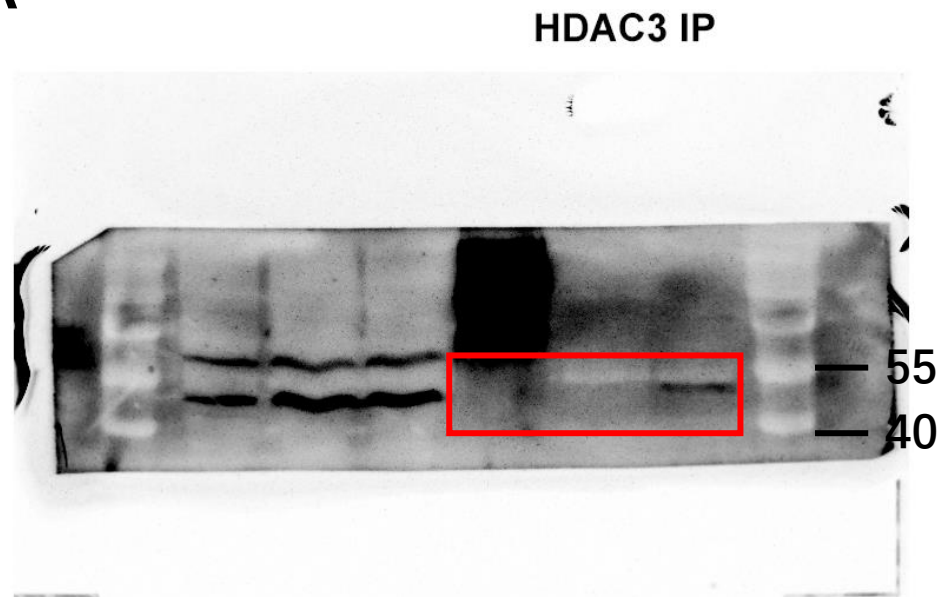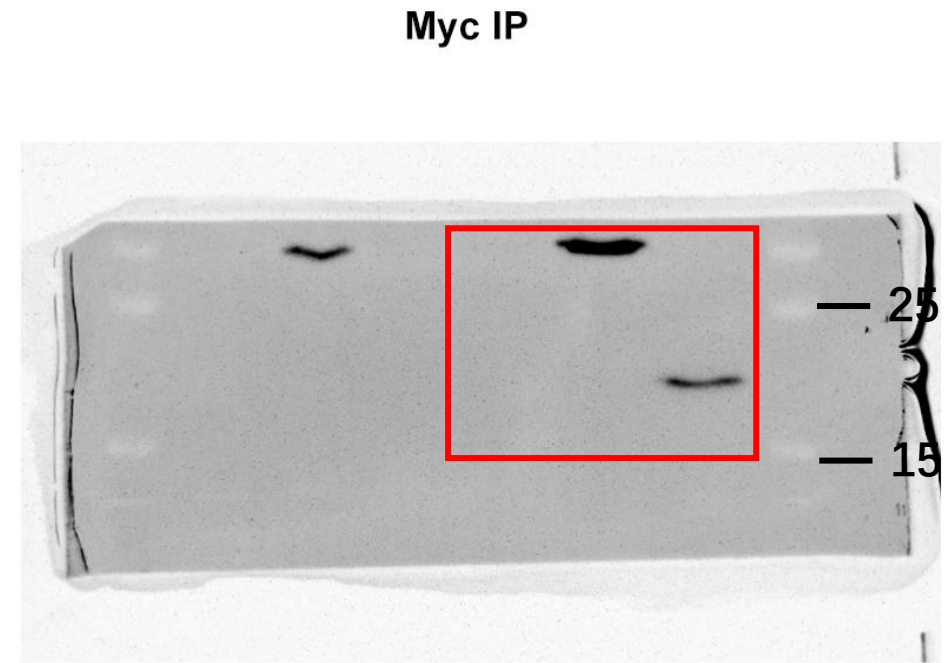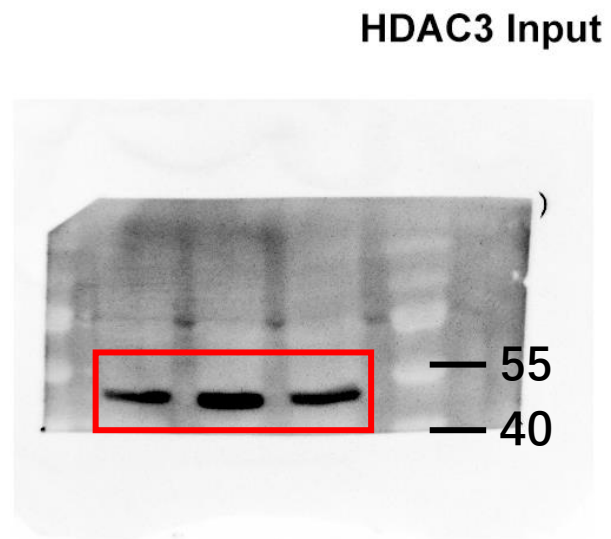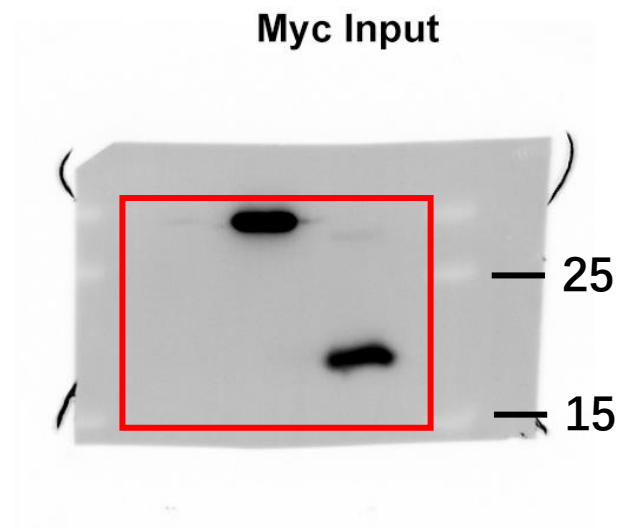

Figure 6B

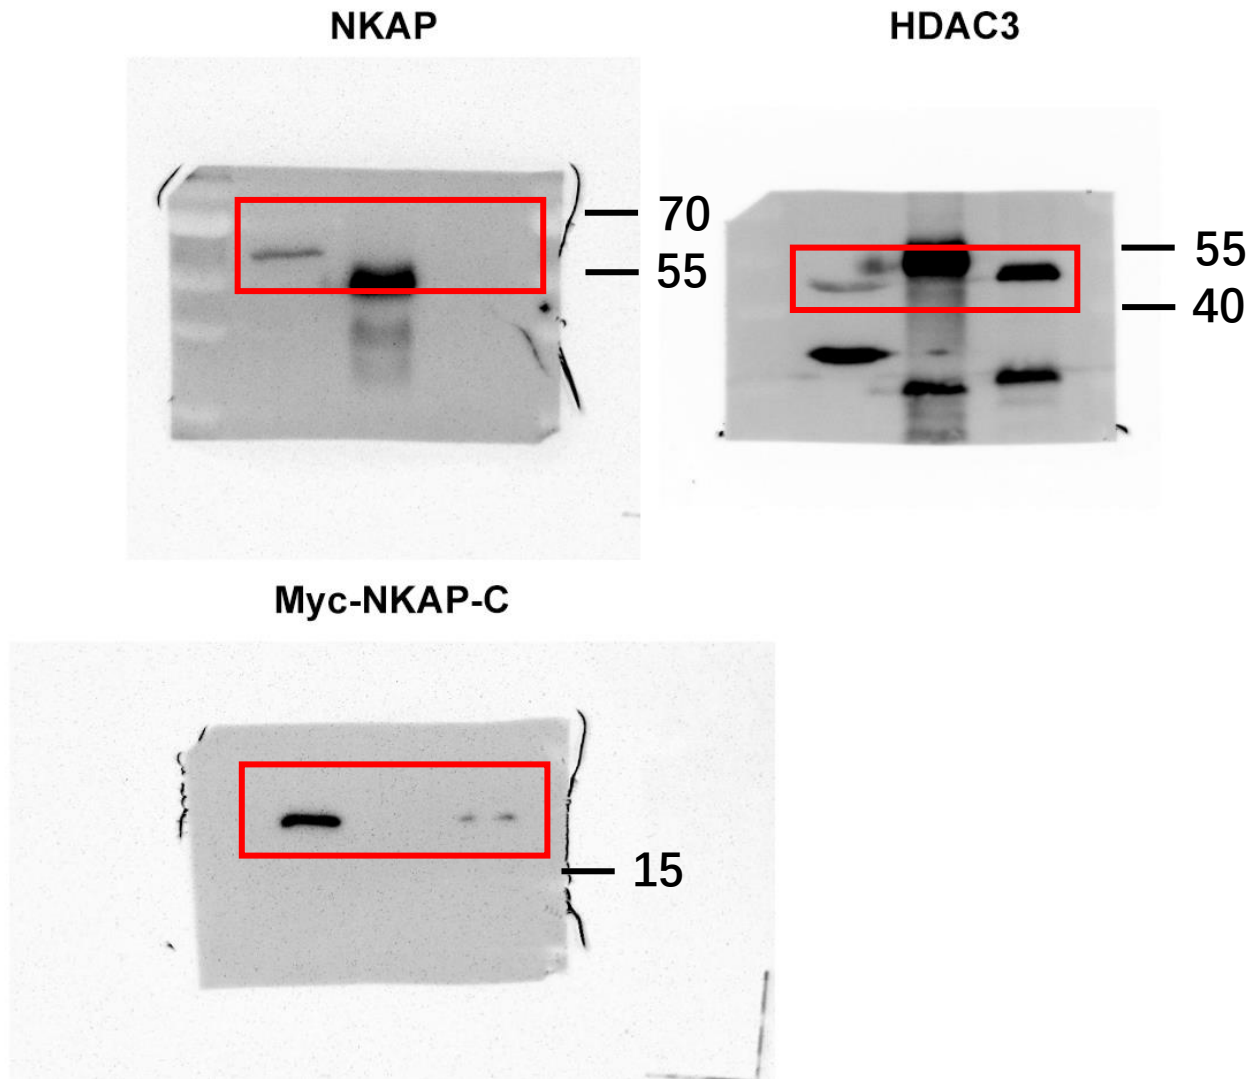

Figure 6H

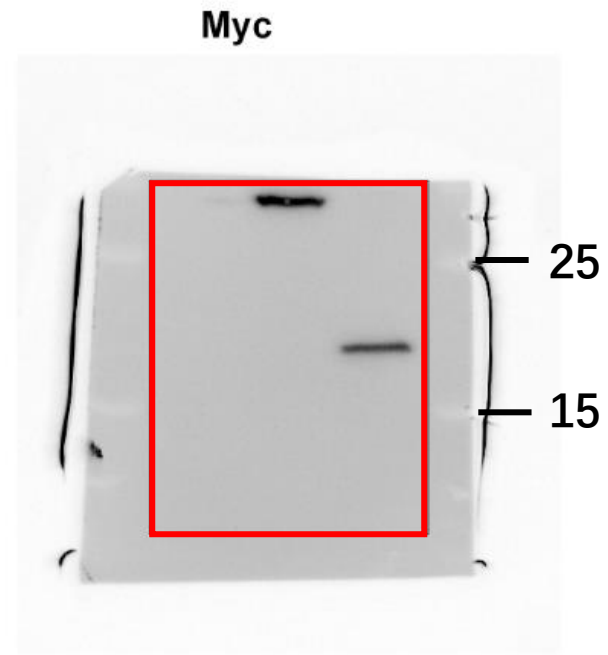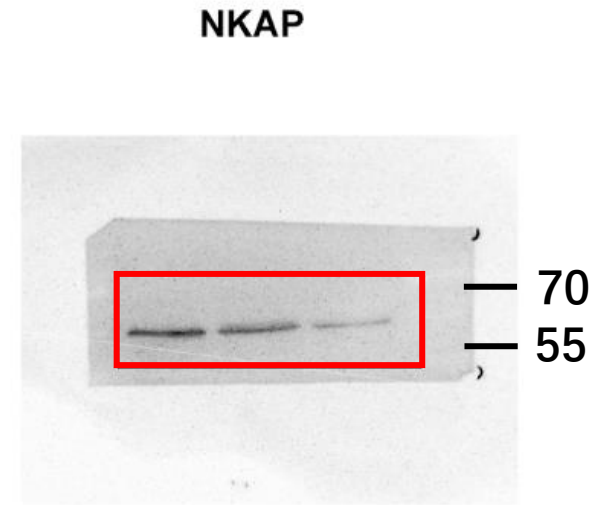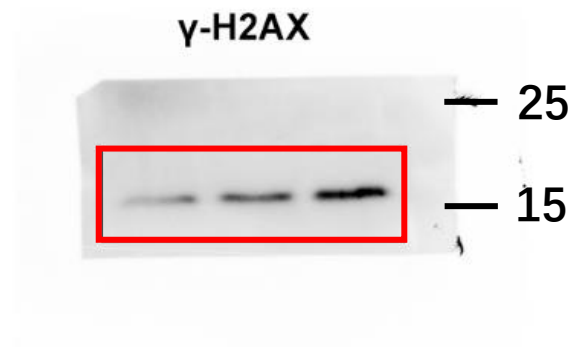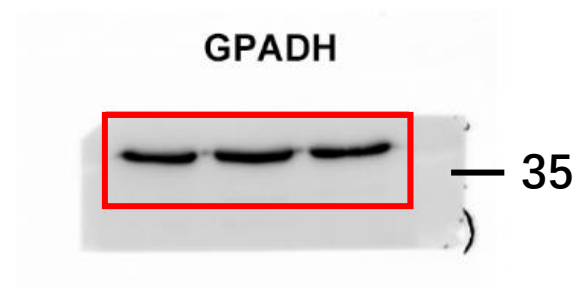

Figure 7A

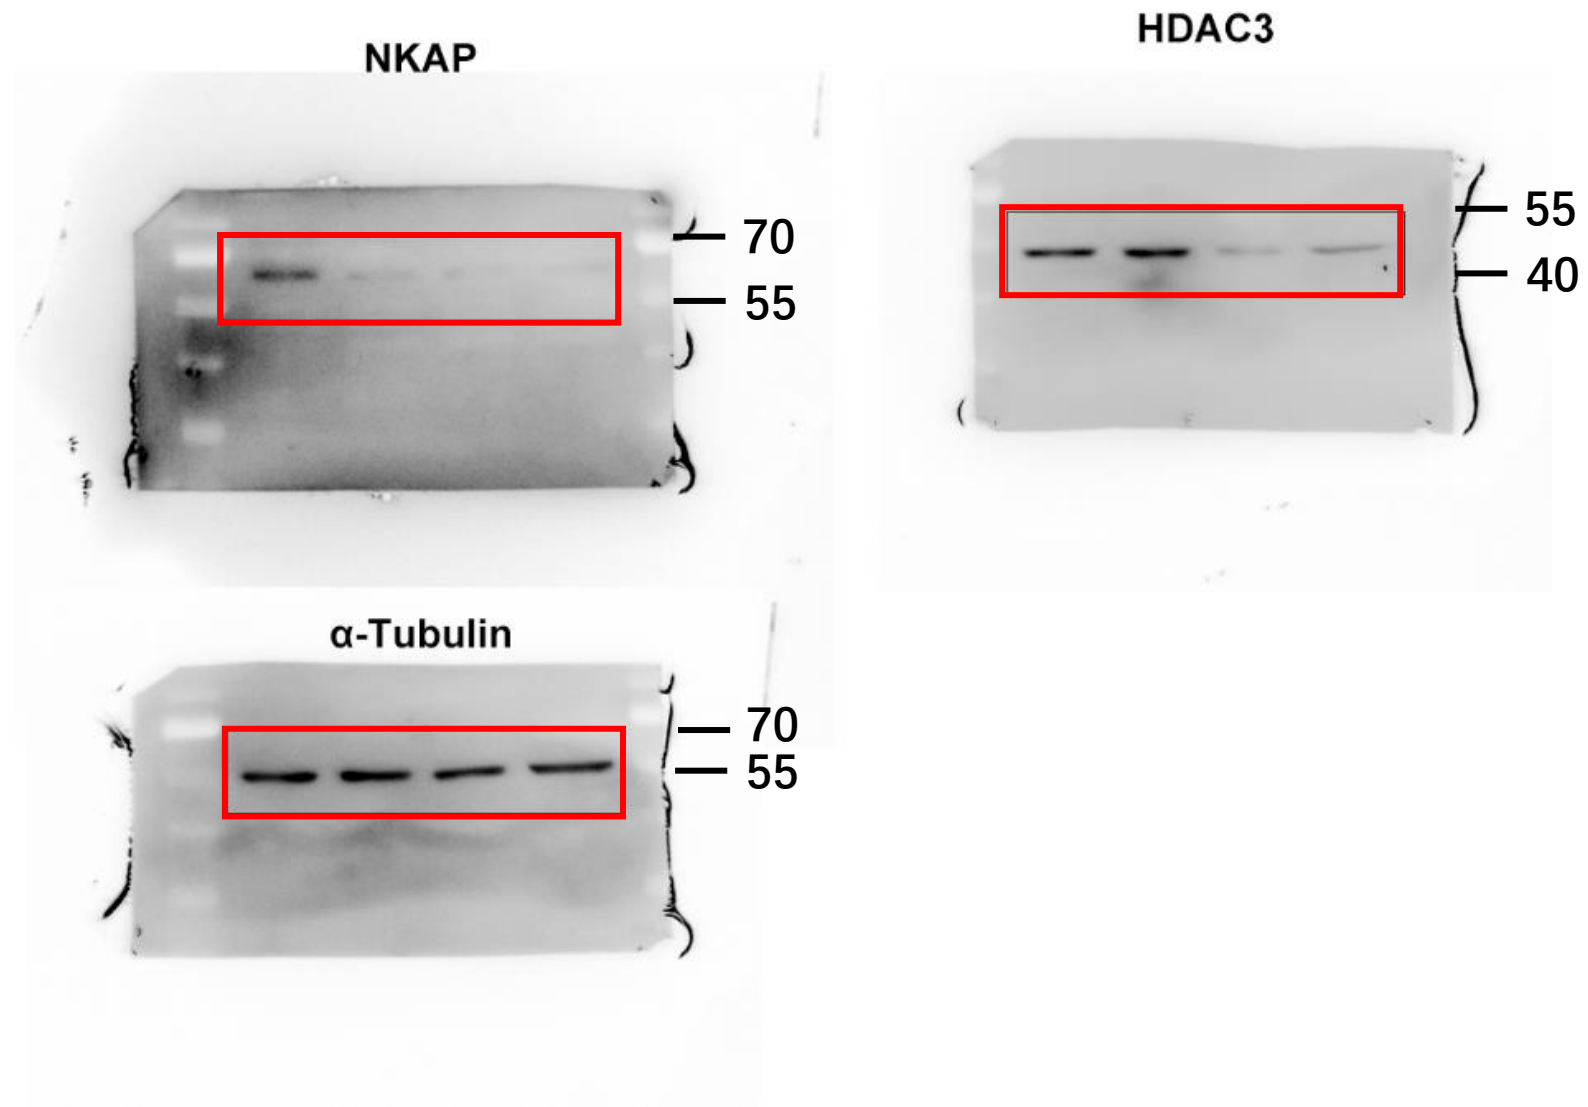

Figure 7D

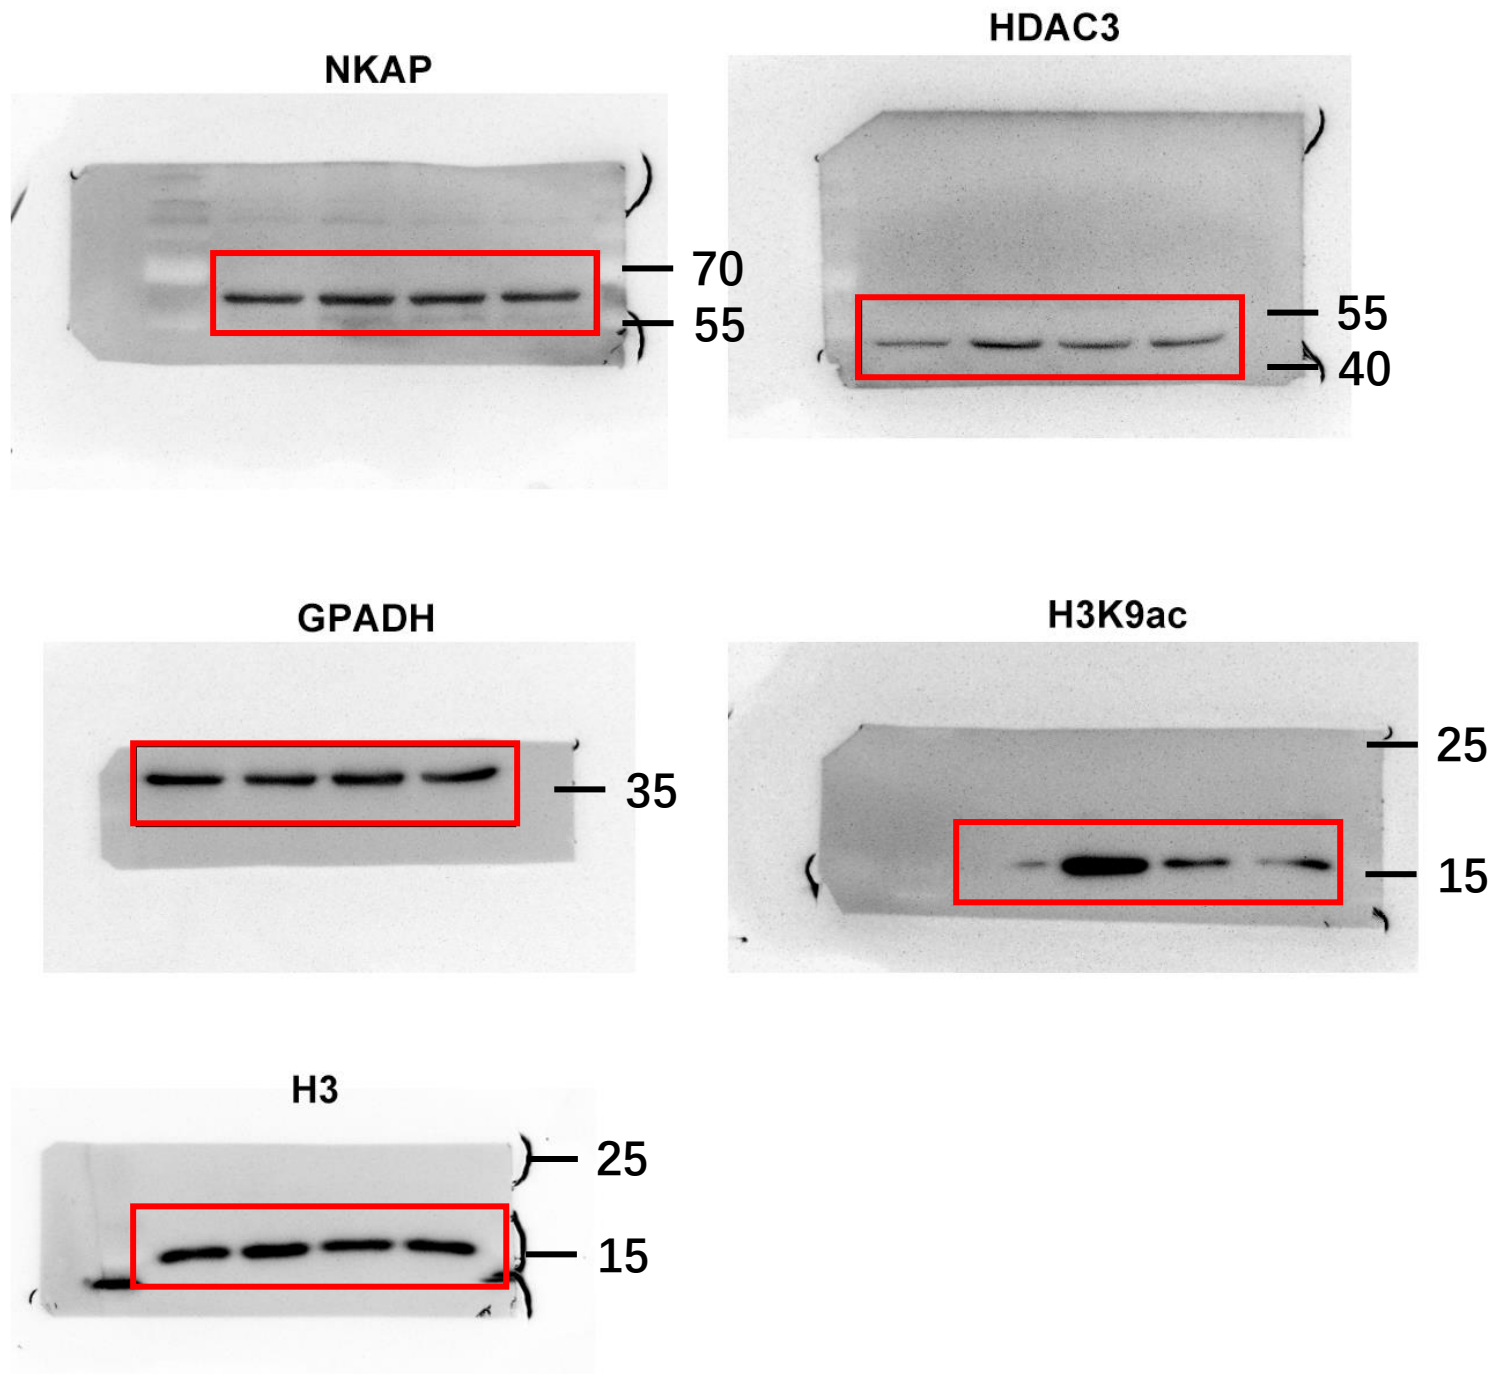

Figure 7E

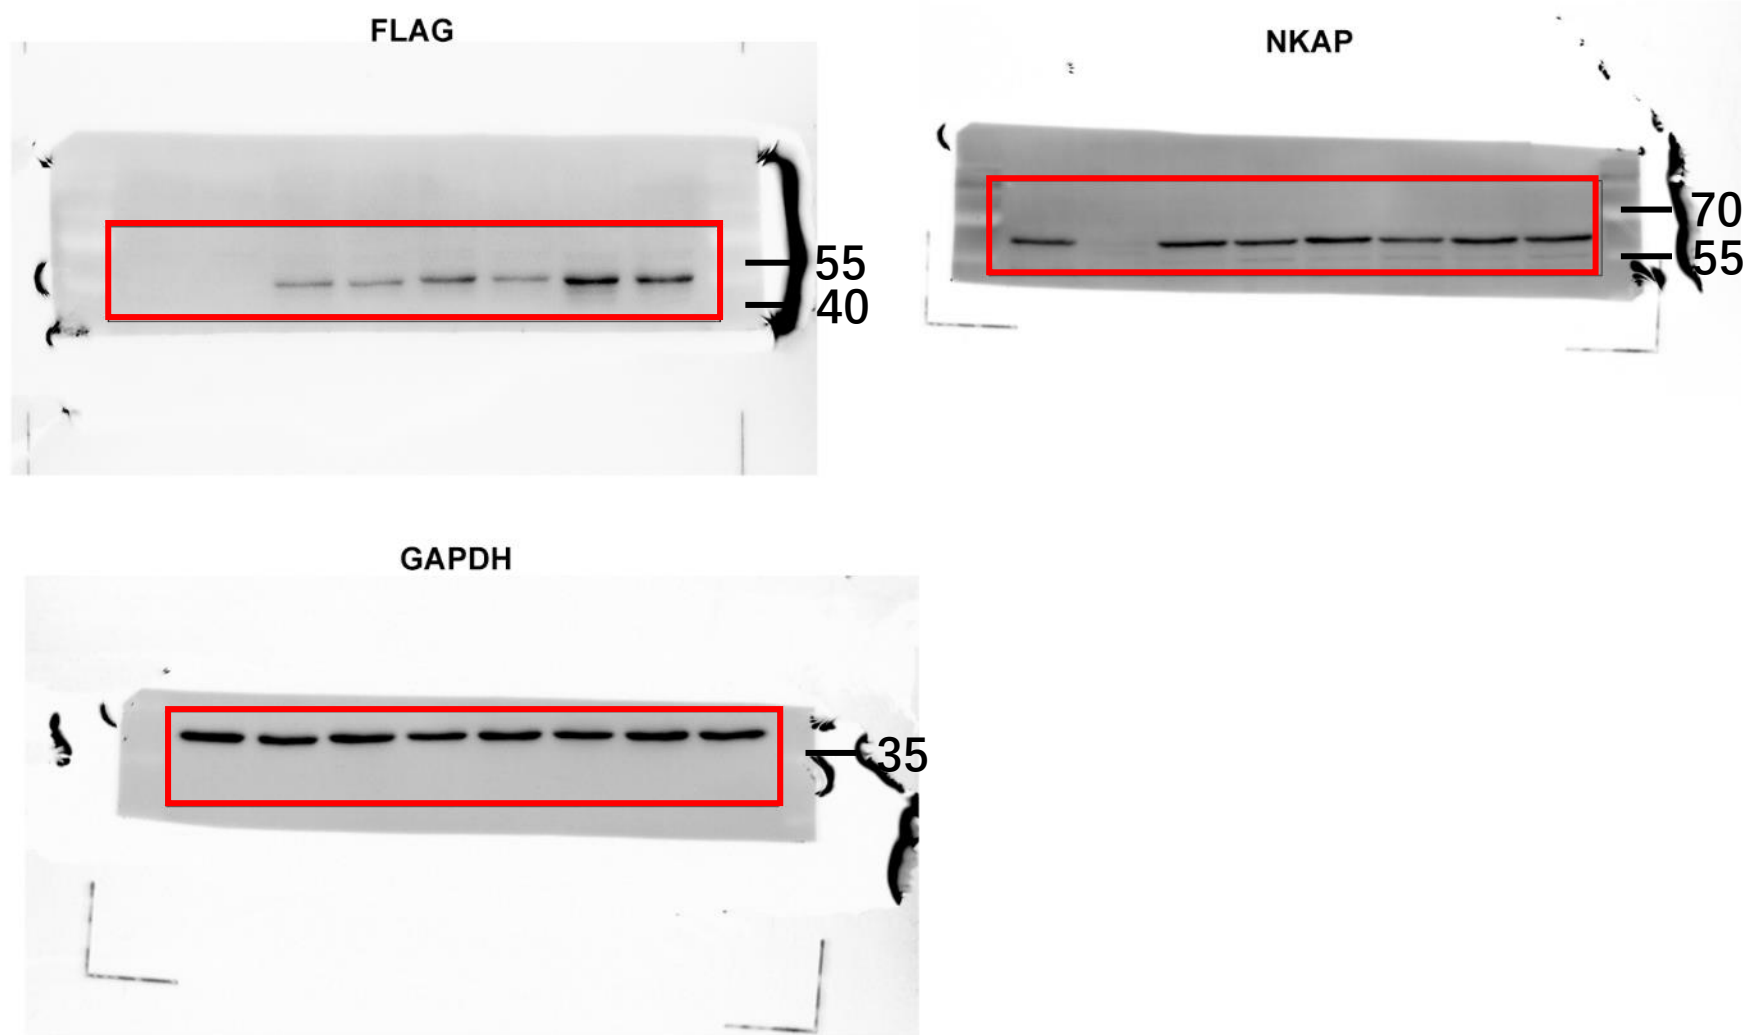

Figure 7F

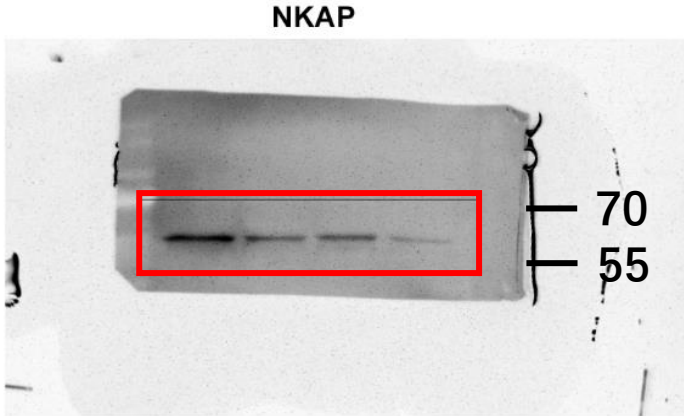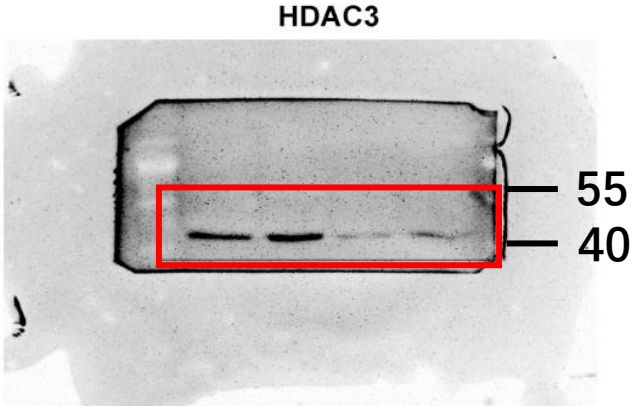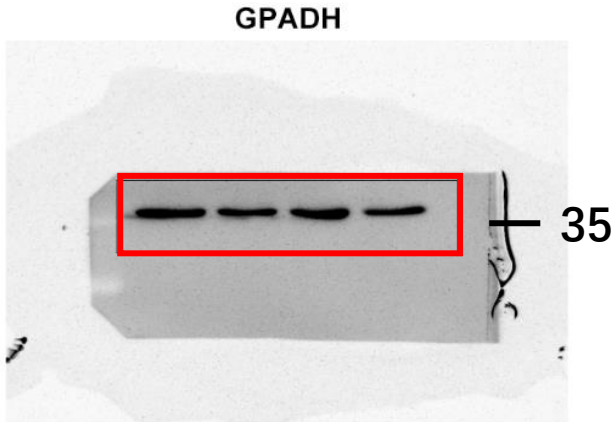

Figure 7G

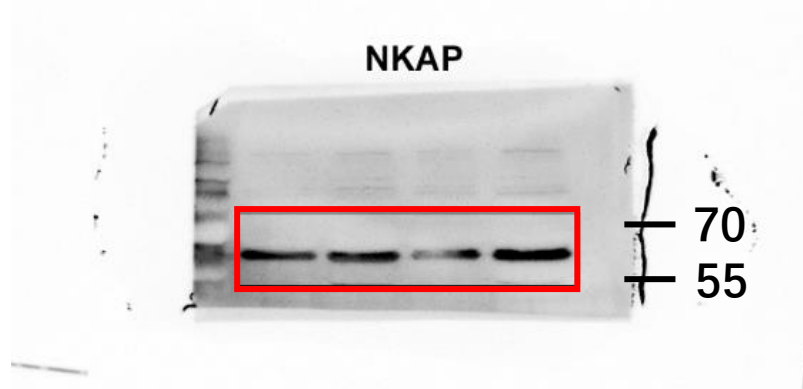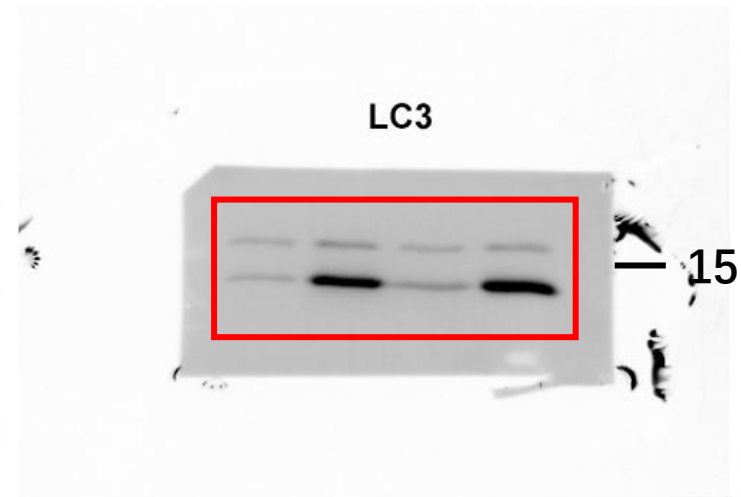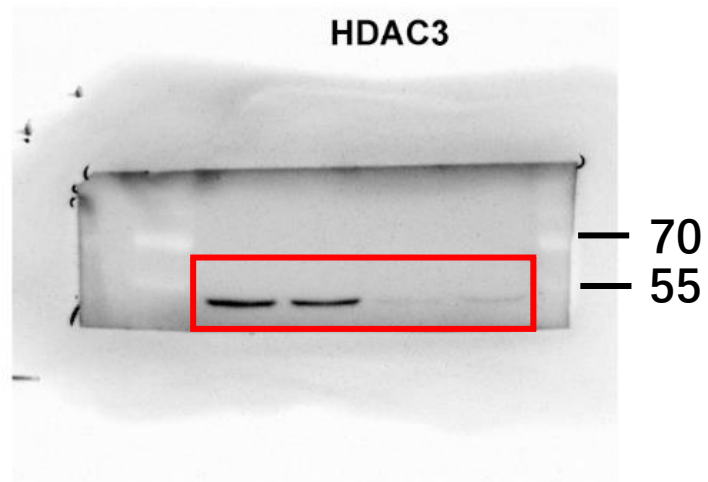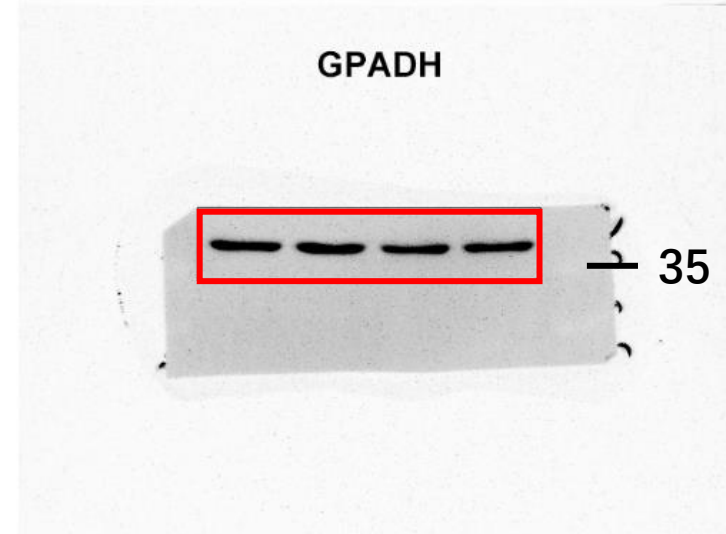



Figure 7H

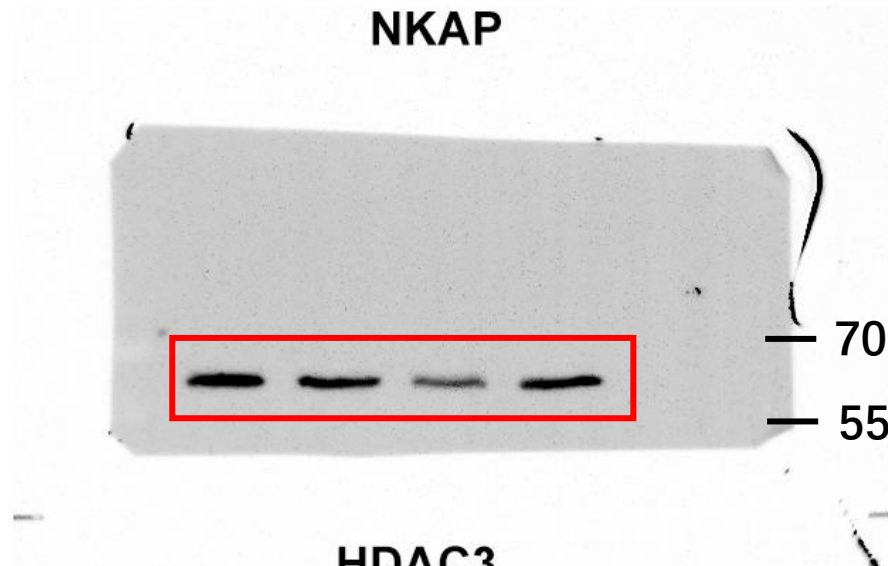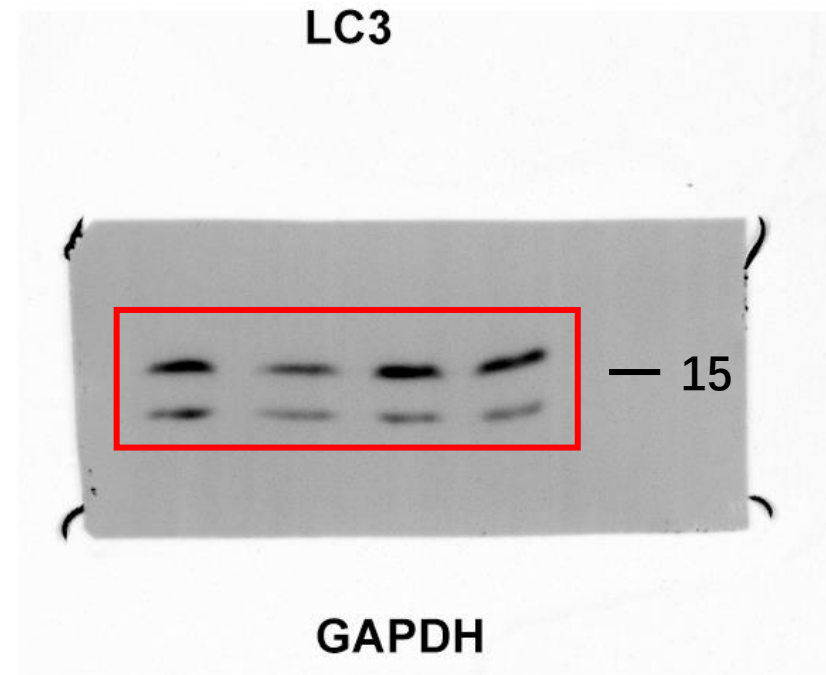

Figure 7K

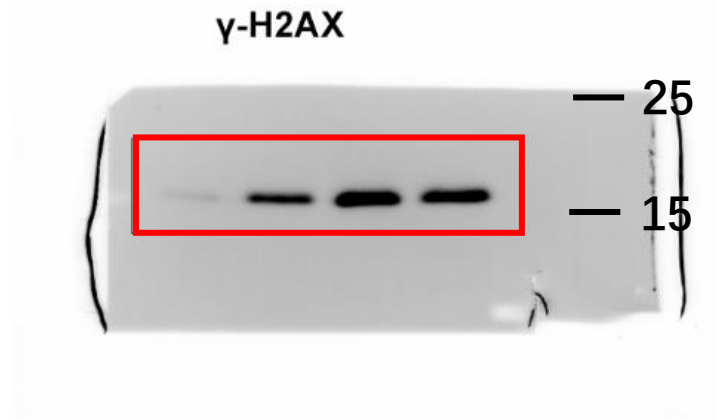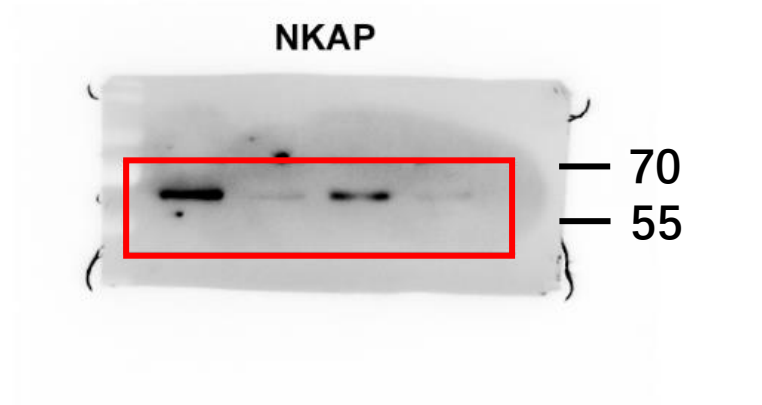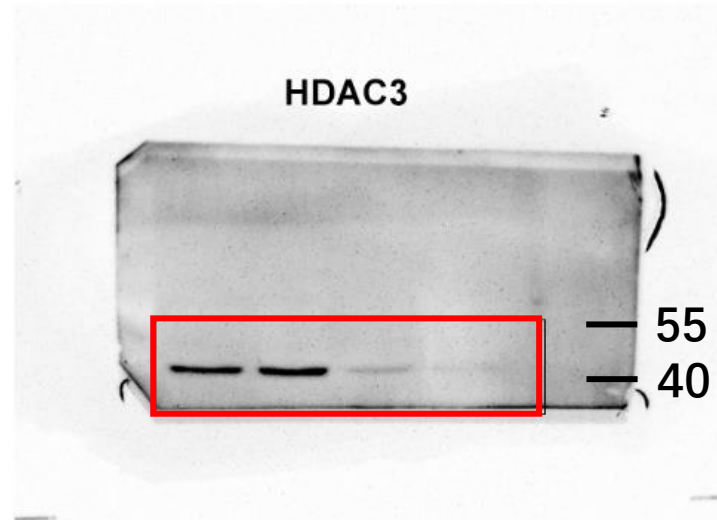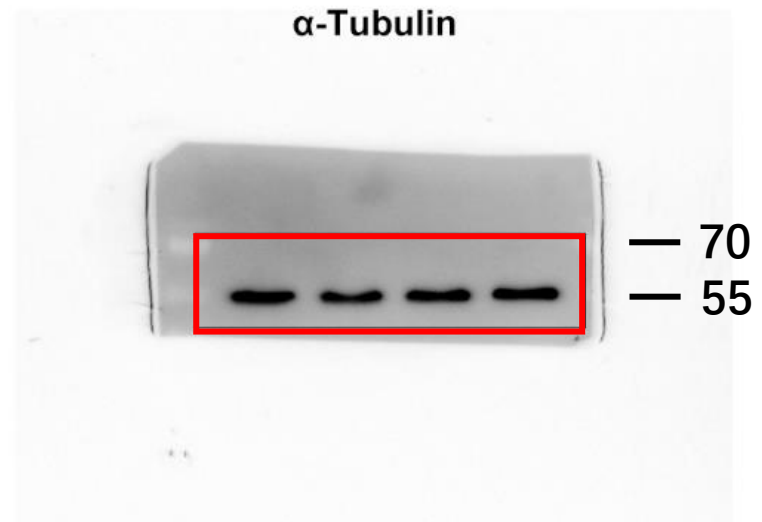

Figure 8A

NKAP

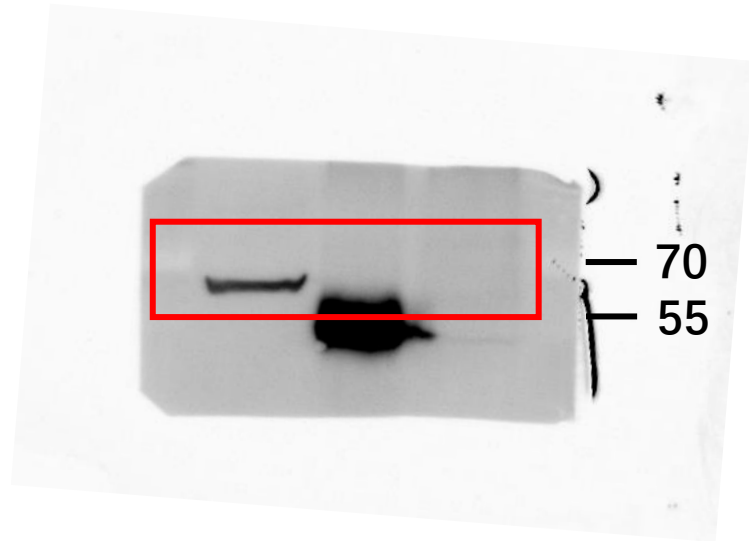

DHX9

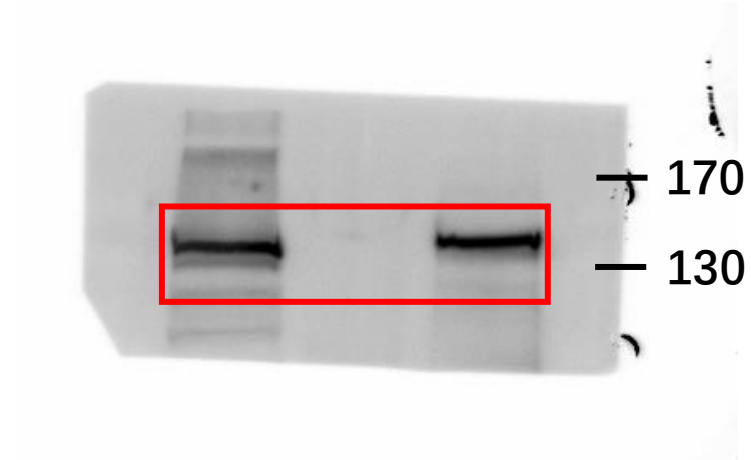

Figure 8E

RNA pol II

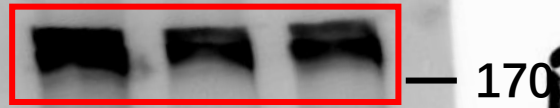

NKAP

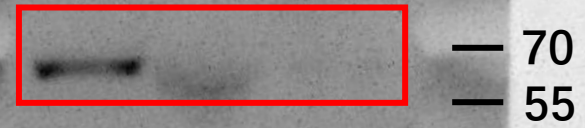

GAPDH

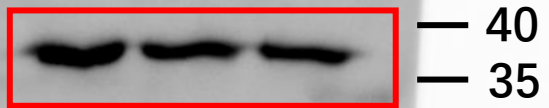

**Figure 8F**

**NKAP**

**RNA pol II**

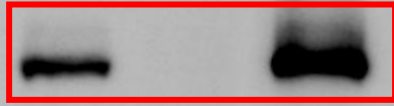

70  
55

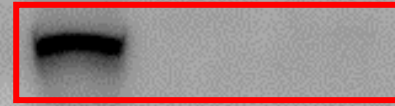

170

**RNA pol II S5**

**RNA pol II S2**

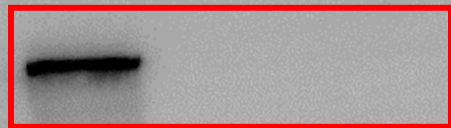

170

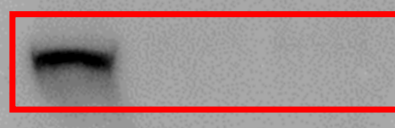

170

Figure 9C

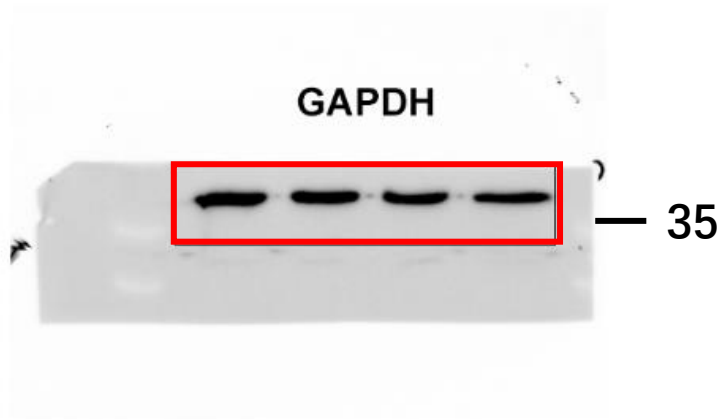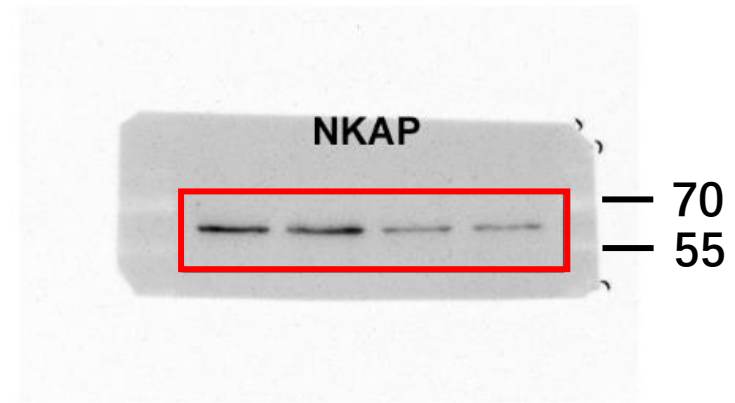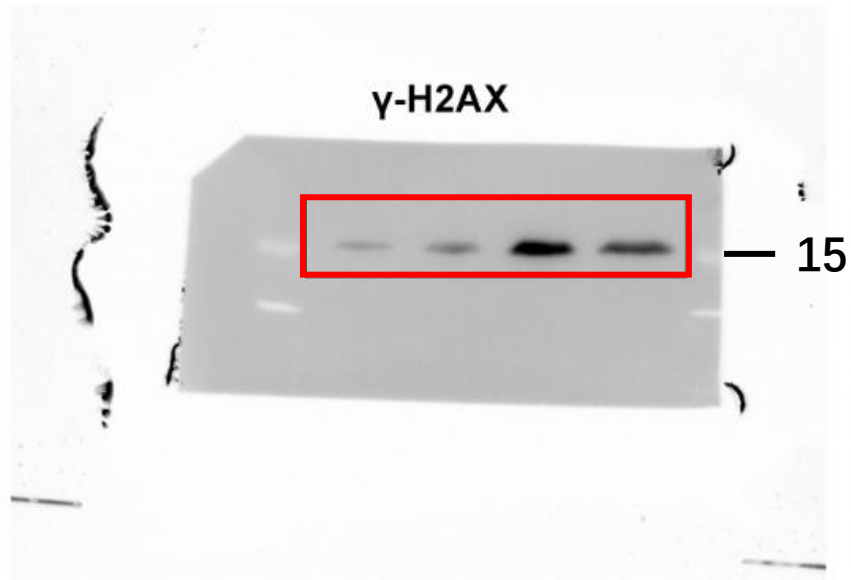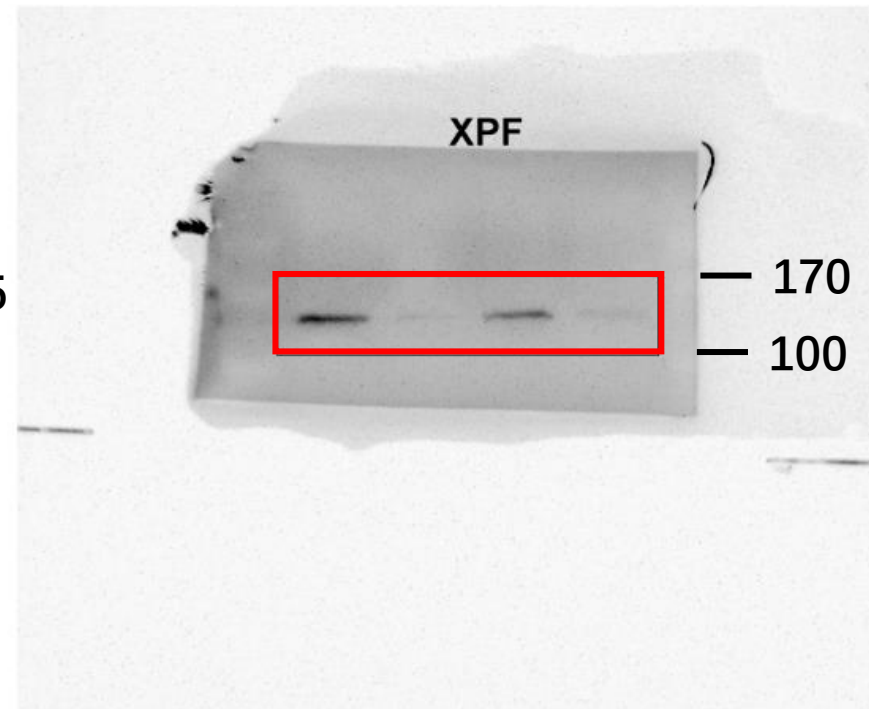

Figure 9D

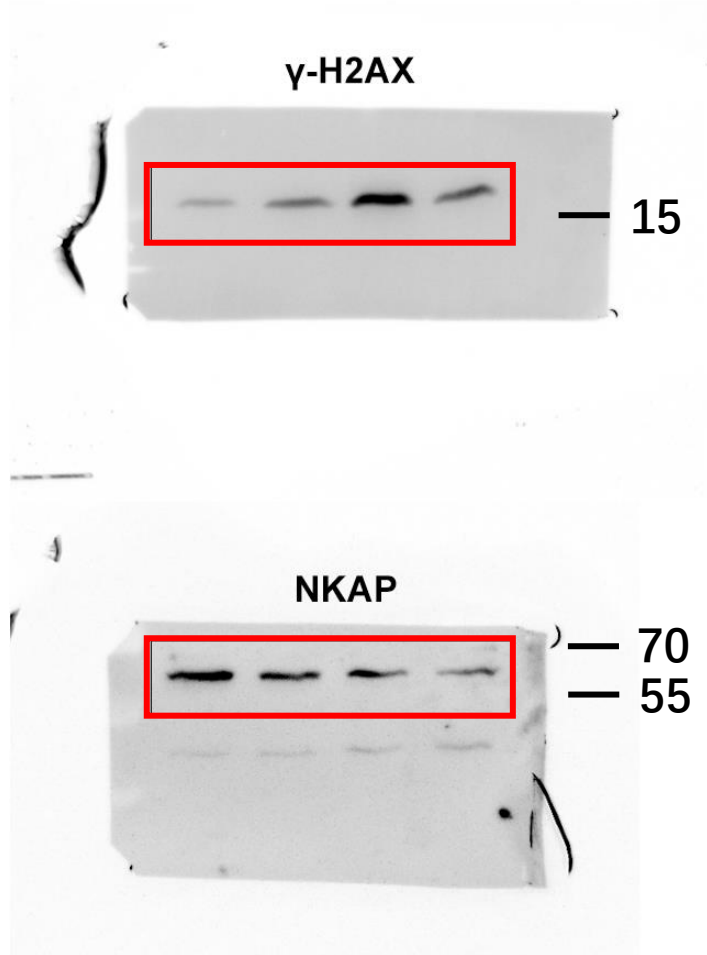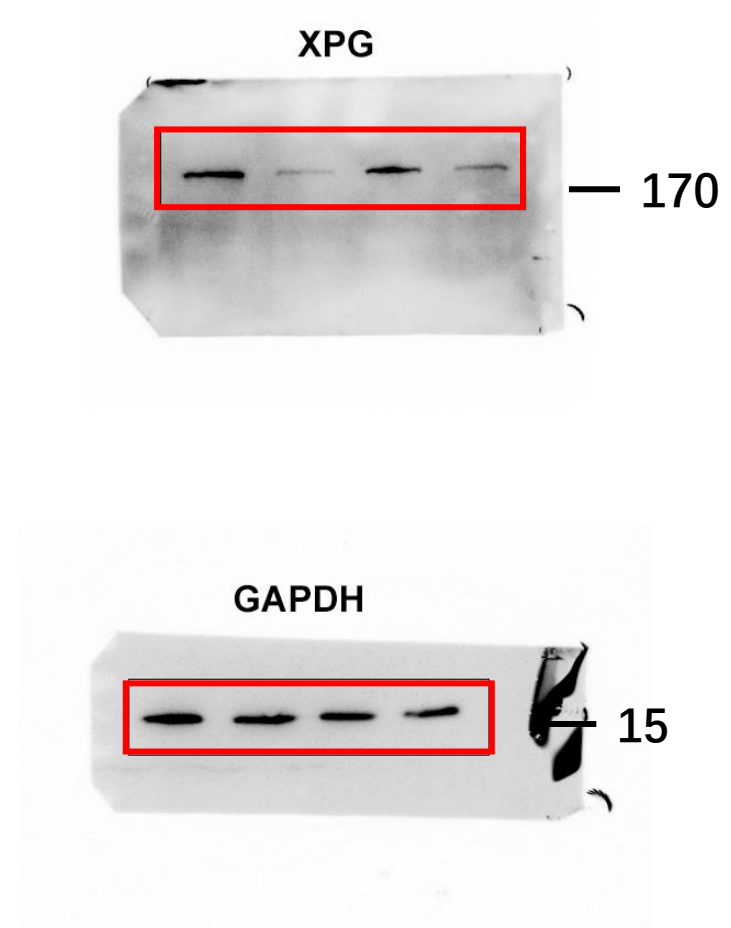

Figure 9G

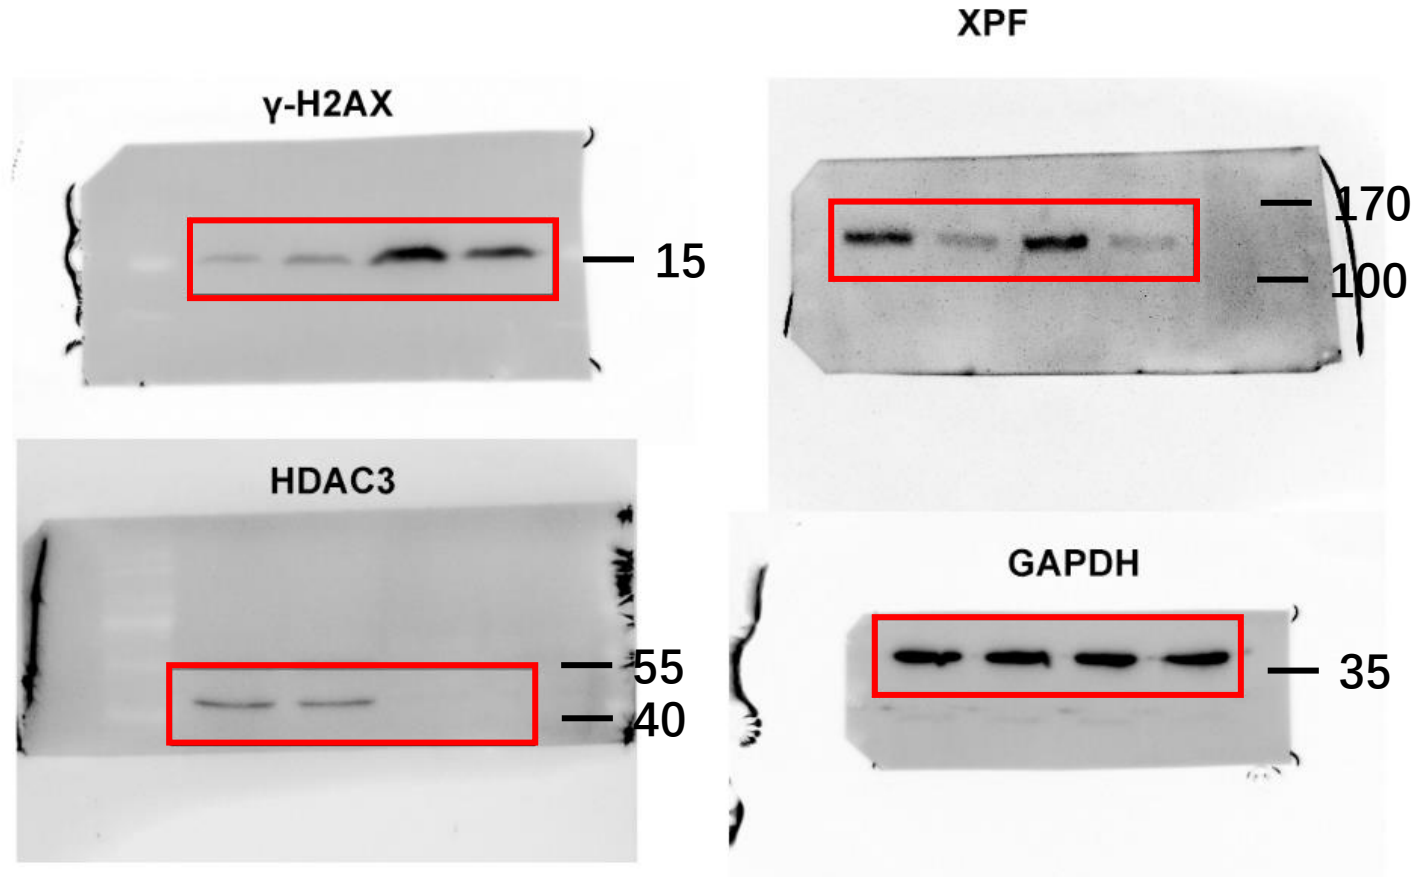



# Figure 9H

$\gamma$ -H2AX

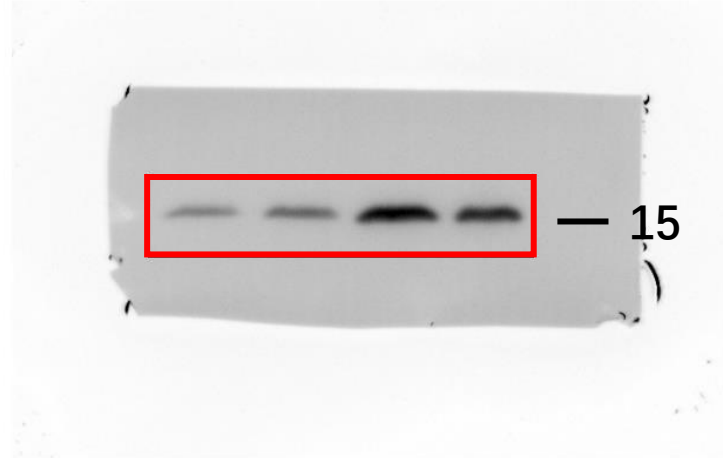

XPG

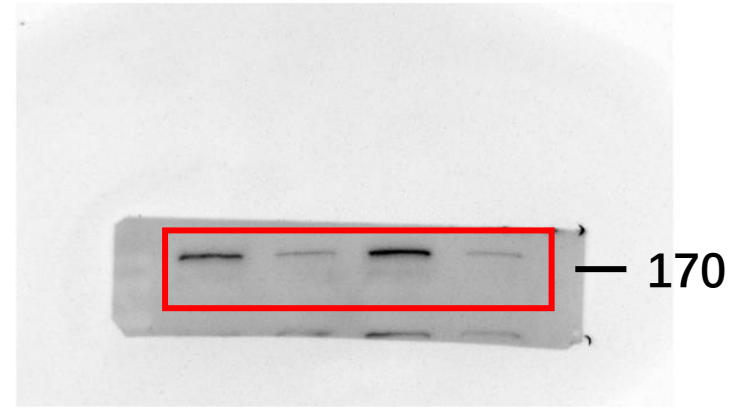

HDAC3

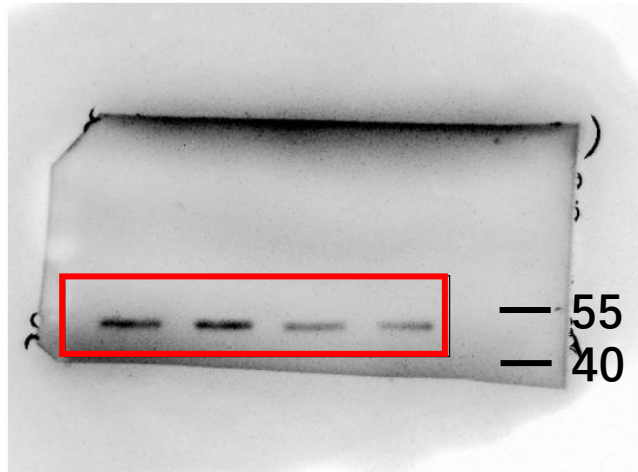

GAPDH

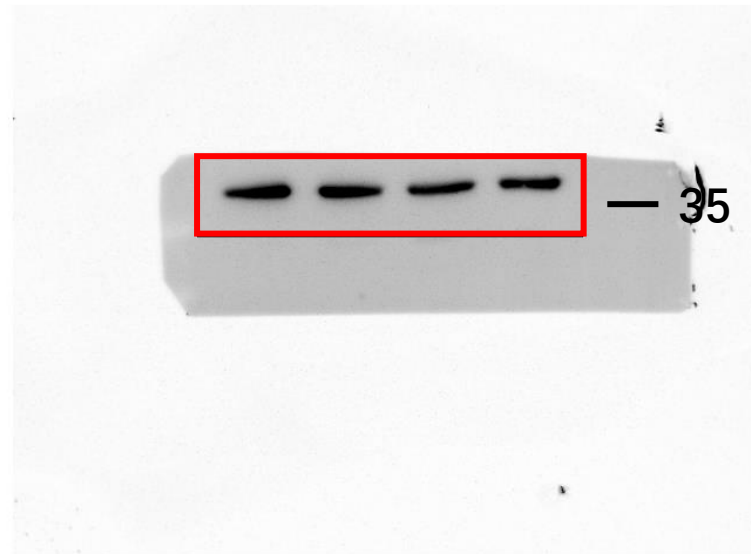

Figure S1

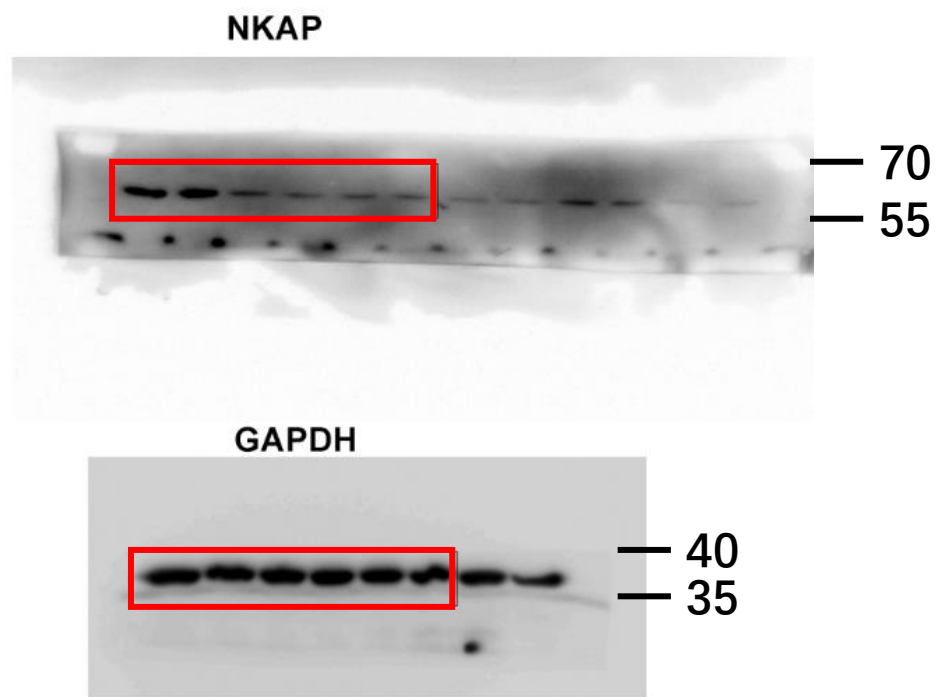

Figure S2E

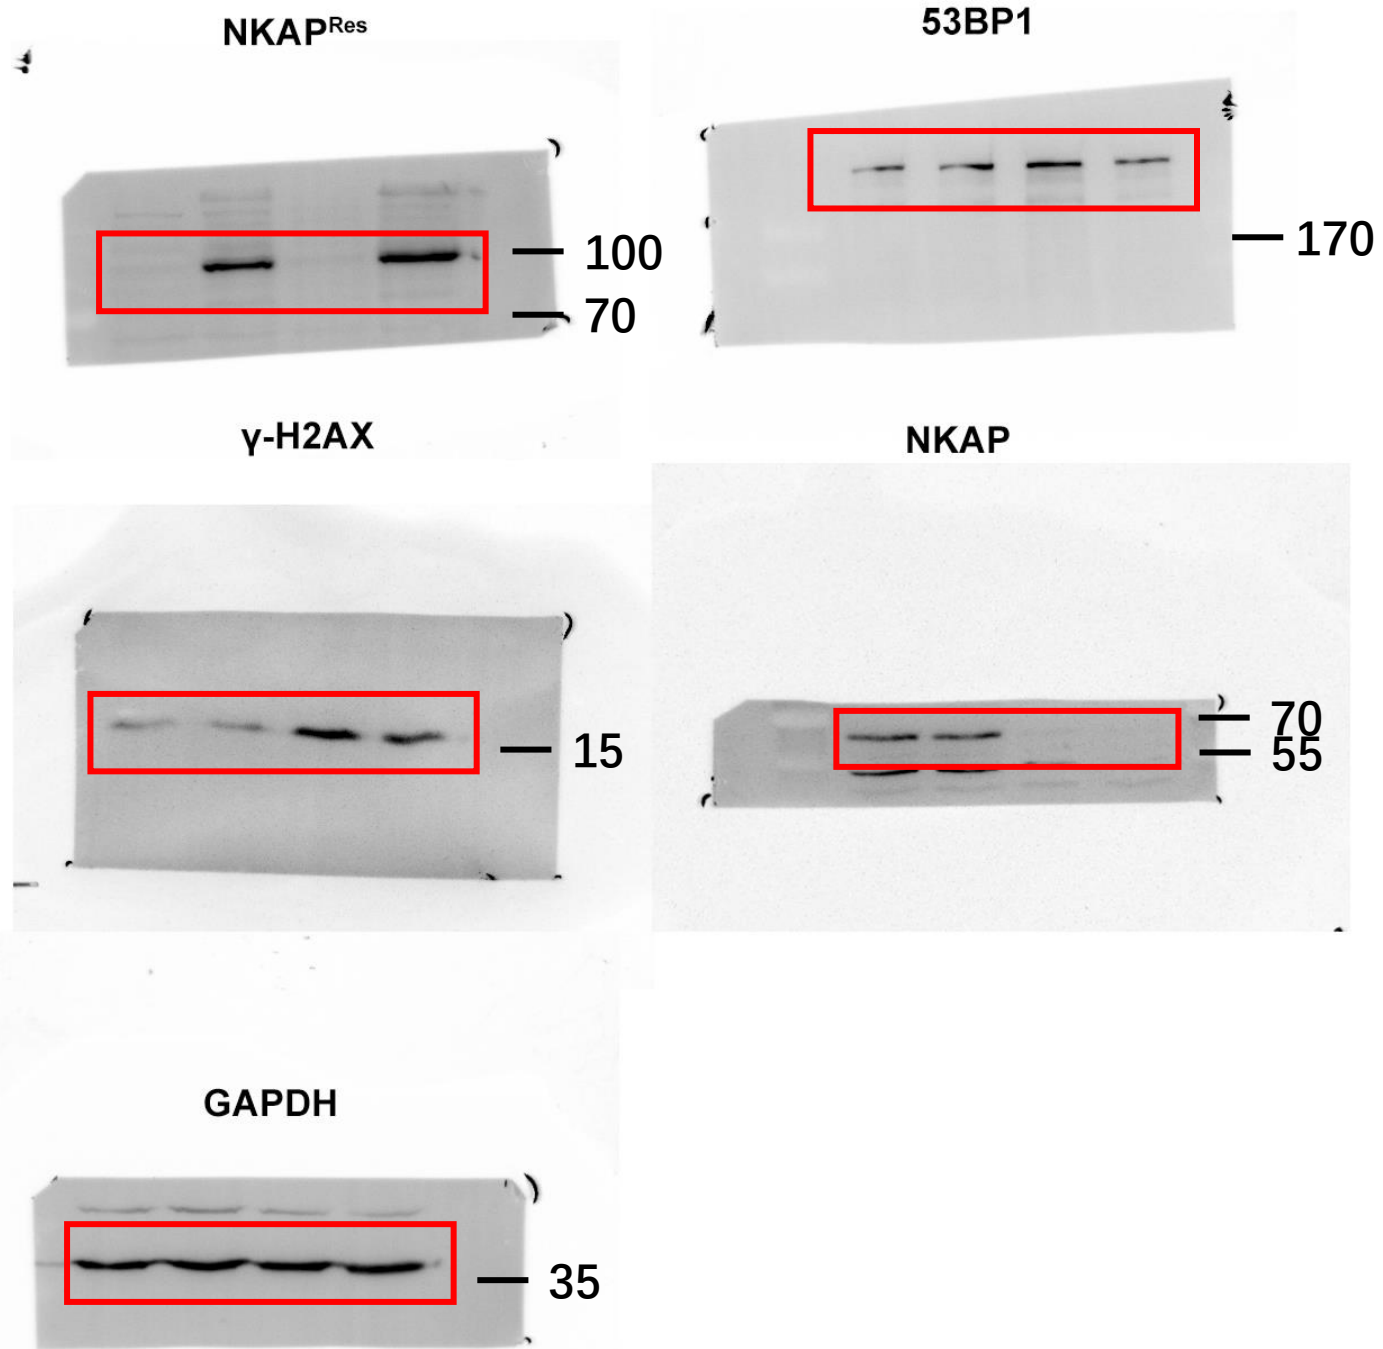

Figure S3E

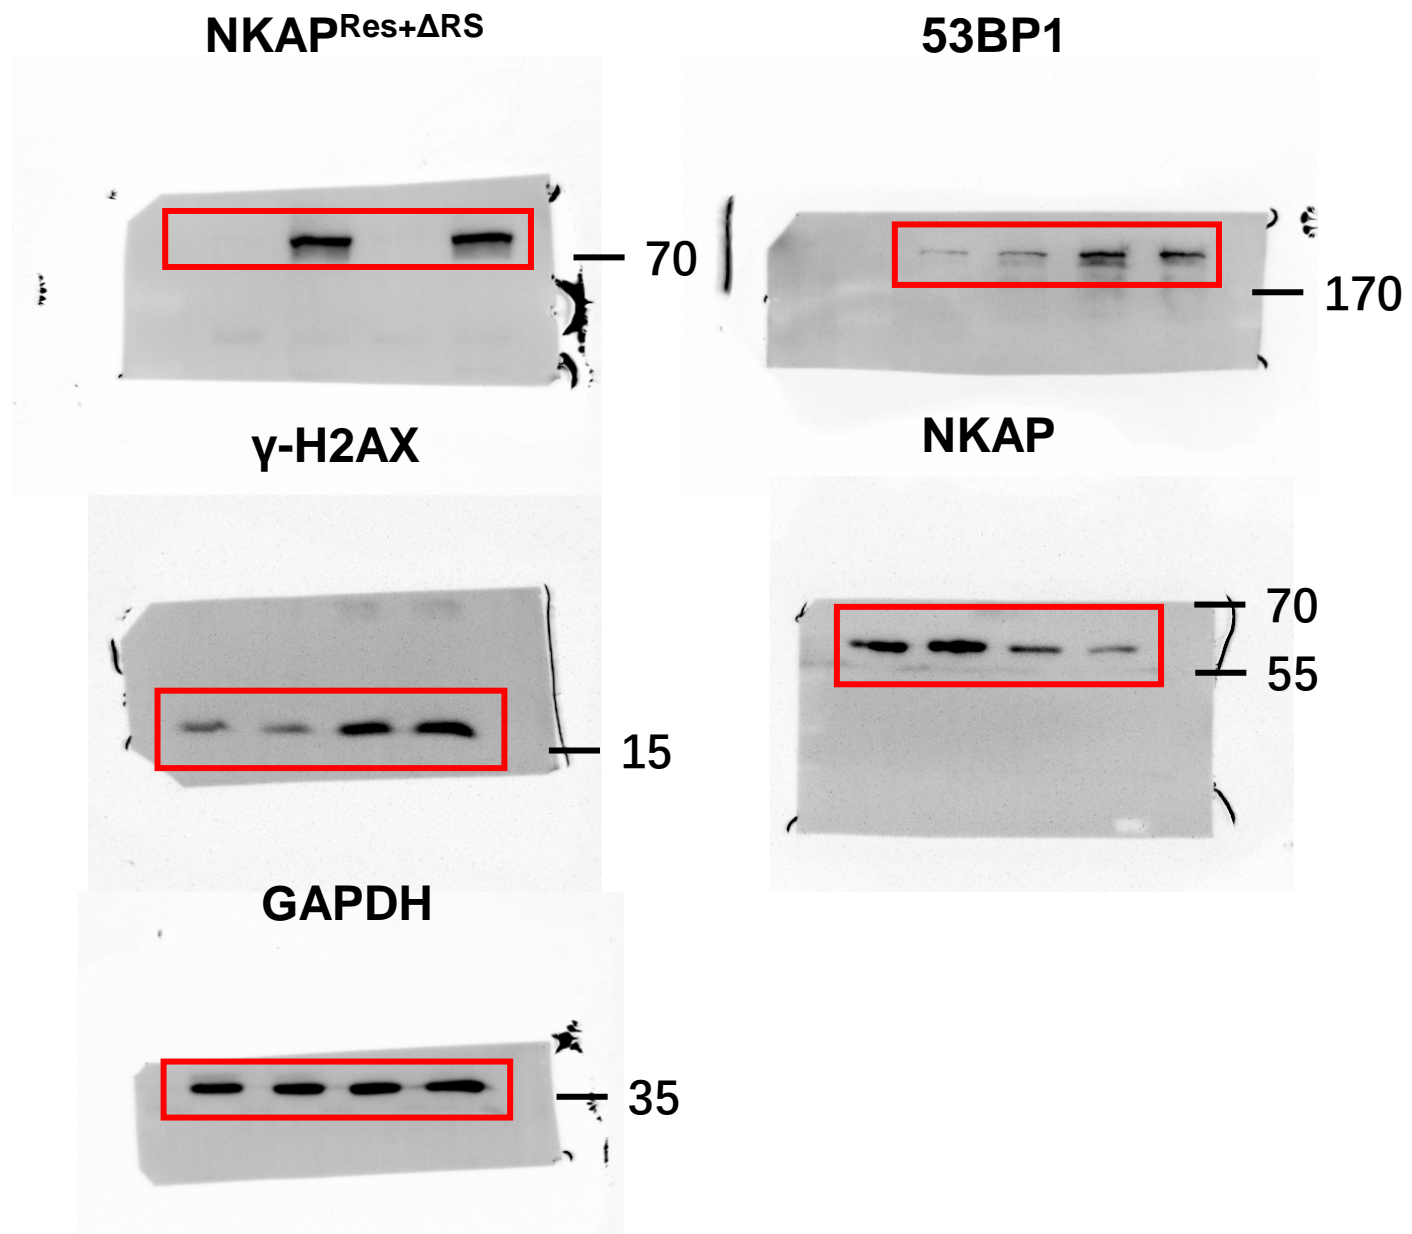

Figure S4C

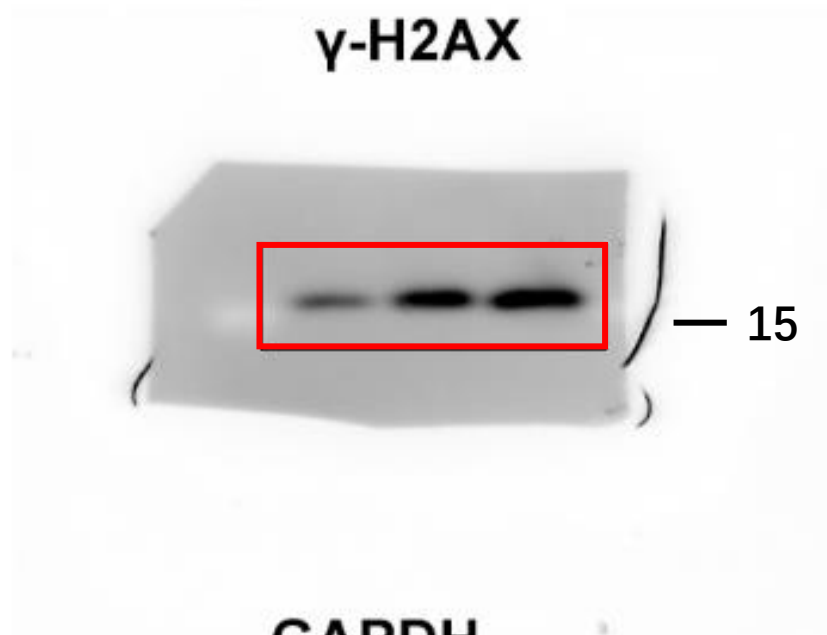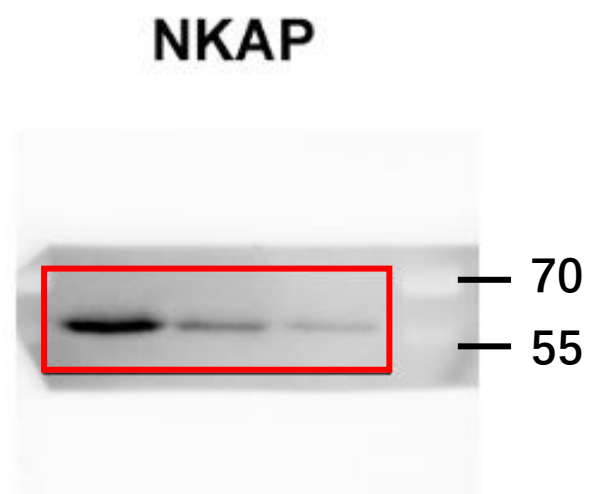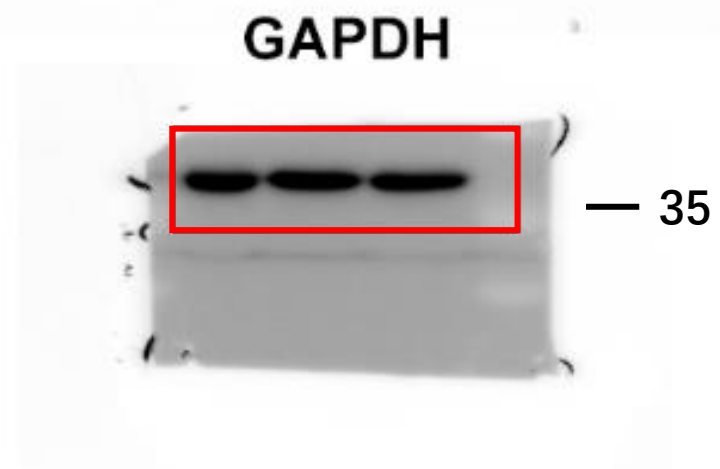

Figure S4F

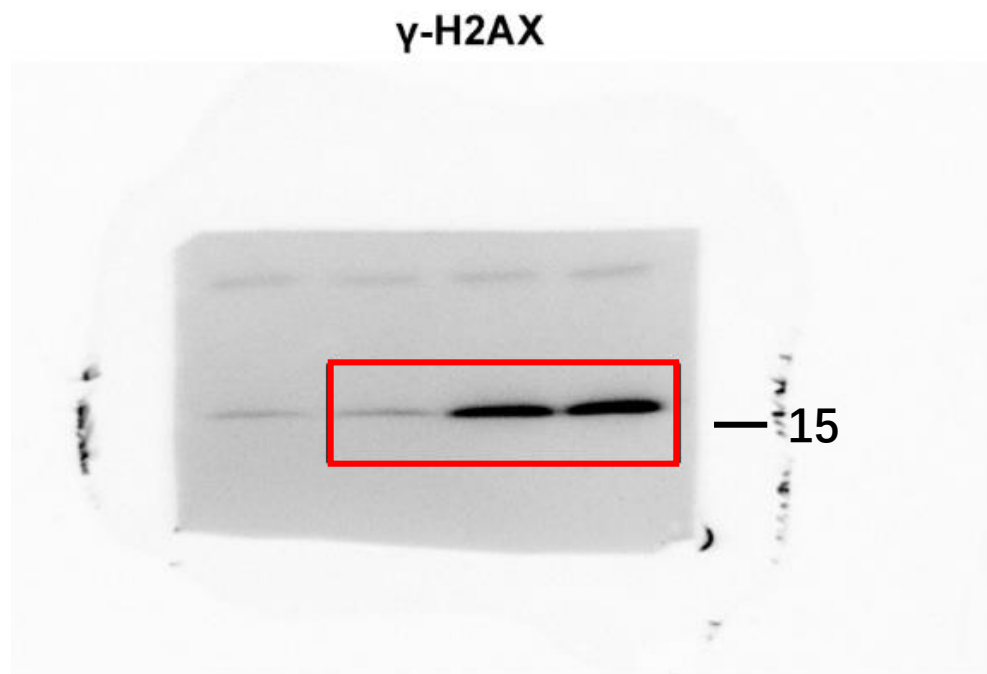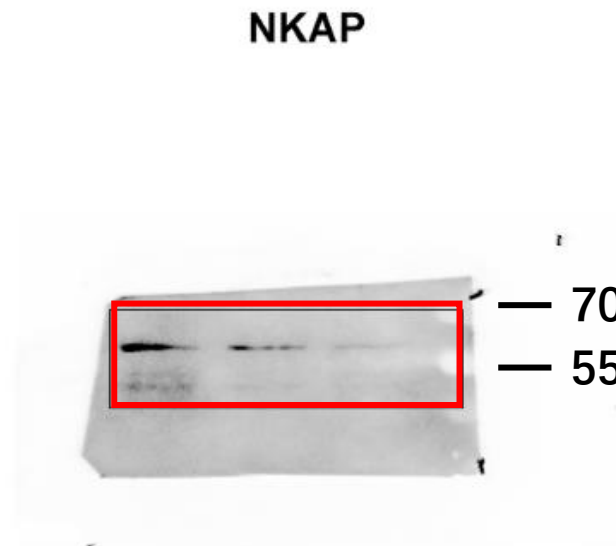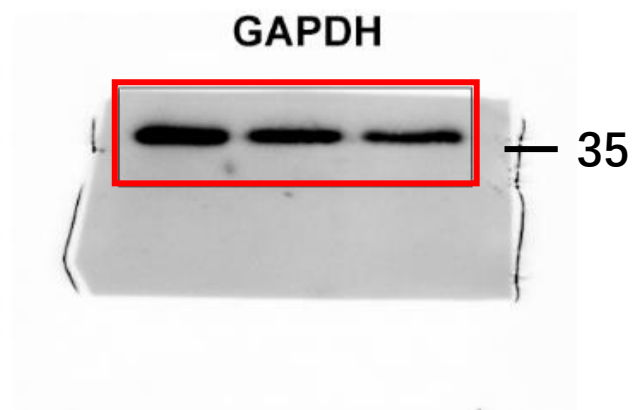

Figure S9H

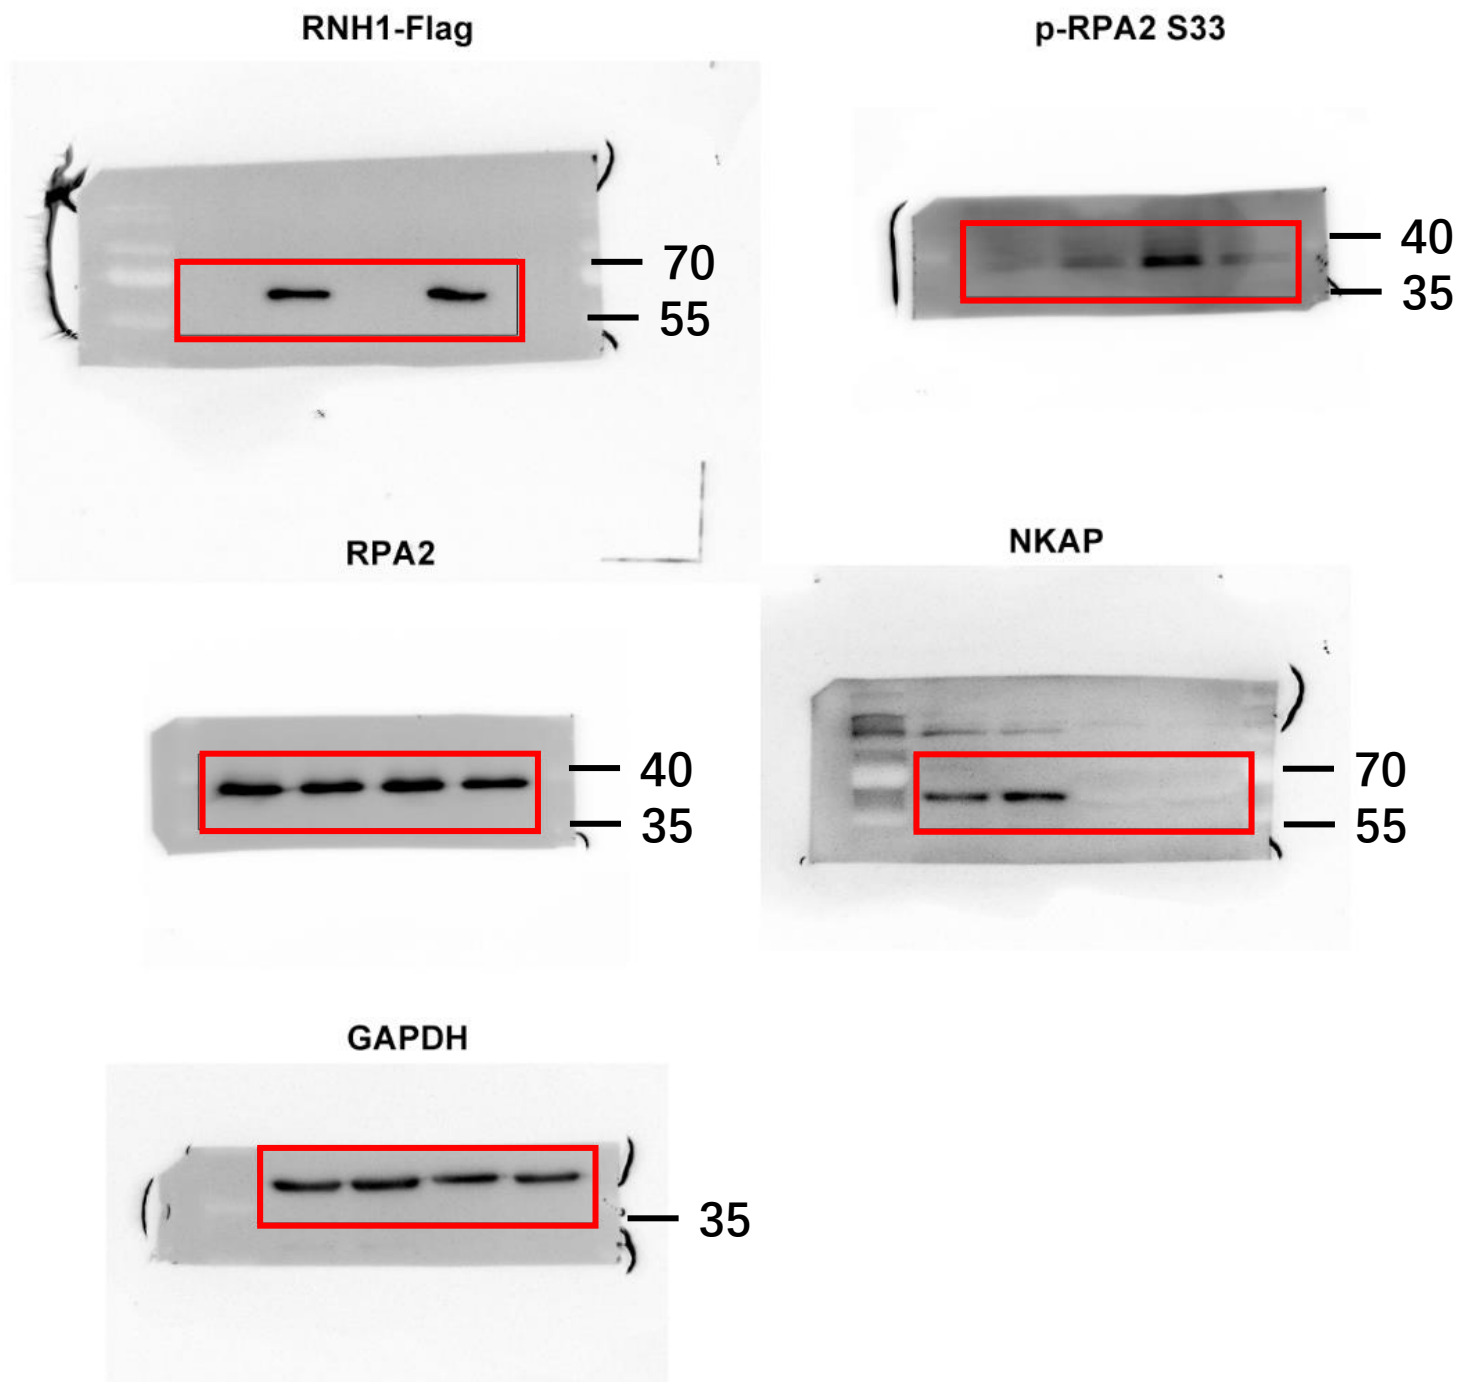

Figure S10F

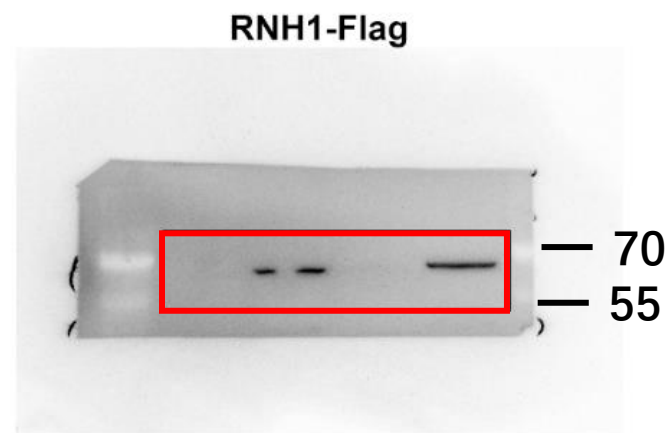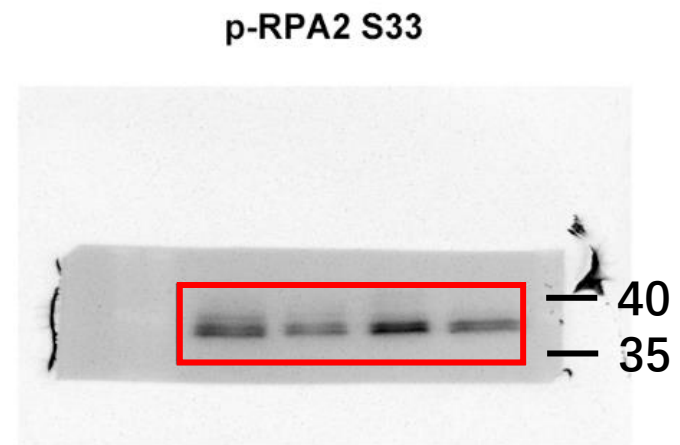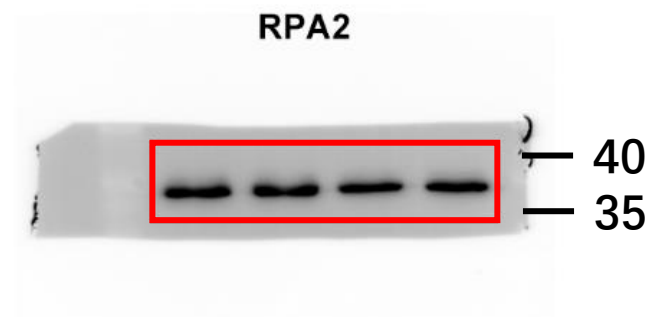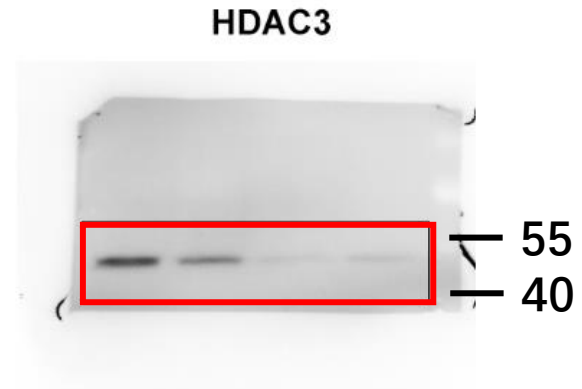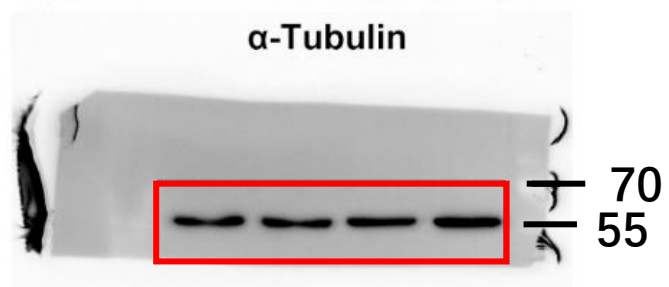



Figure S11E

$\gamma$ -H2AX

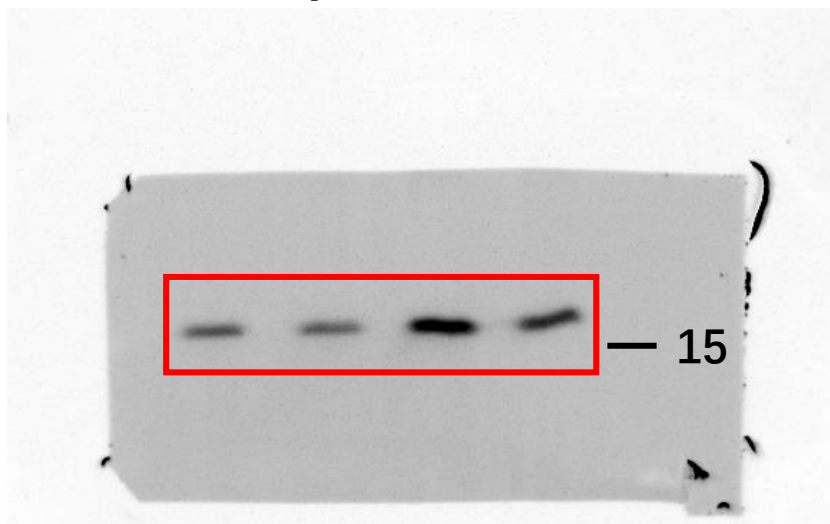

GFP-NKAP

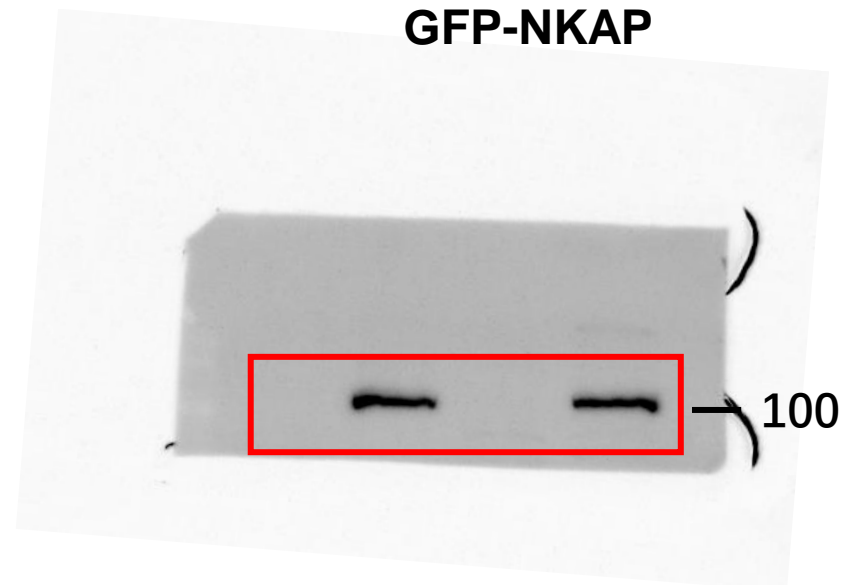

HDAC3

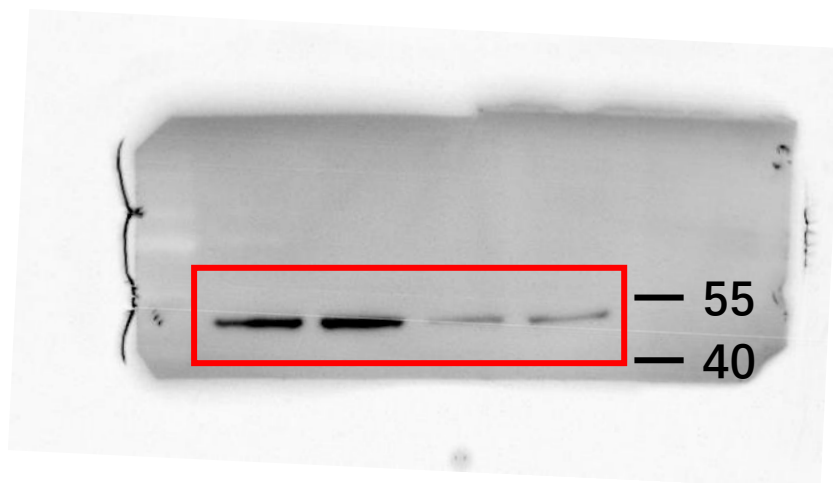

GAPDH

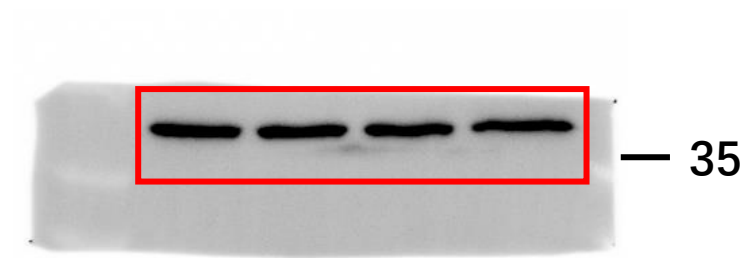

Supplement: 41418_2023_1182_MOESM3_ESM.pdf [file 41418_2023_1182_MOESM3_ESM.pdf]
